# Supplementary material for: Synthesis of Polyether, Poly(Ether Carbonate) and Poly(Ether Ester) Polyols Using Double Metal Cyanide Catalysts Bearing Organophosphorus Complexing Agents
Source: MDPI journal article supplement (doi:10.3390/polym16060818), 2024-03-14
Supplement: s1 [file s1]

Supporting Information

Synthesis of polyether, poly(ether carbonate) and  
poly(ether ester) polyols using double metal cyanide  
catalysts bearing organophosphorus complexing  
agents

*Eun-Gyeong Lee, Chinh Hoang Tran, Ju-Yeong Heo, So-Young Kim, Ha-Kyung Choi, Byeong-  
Ryeol Moon, and Il Kim \**

School of Chemical Engineering, Pusan National University, Busandaehag-ro 63-2, Geumjeong-  
gu, Busan 46241, Republic of Korea.

**\*Corresponding Author.**

E-mail address: [ilkim@pusan.ac.kr](mailto:ilkim@pusan.ac.kr); Tel.: +82-51-510-2466.

## Table of Contents

|                                                                                                                                                                                                                                                                                                                            |           |
|----------------------------------------------------------------------------------------------------------------------------------------------------------------------------------------------------------------------------------------------------------------------------------------------------------------------------|-----------|
| <b>1. Supplementary figures.....</b>                                                                                                                                                                                                                                                                                       | <b>6</b>  |
| <b>1.1 Characterization of DMC catalysts .....</b>                                                                                                                                                                                                                                                                         | <b>6</b>  |
| <b>Fig. S1</b> FTIR spectra of the DMC-DEP prepared using various temperature and DMC-<br>H <sub>3</sub> PO <sub>3</sub> .....                                                                                                                                                                                             | 6         |
| <b>Fig. S2</b> FTIR spectra of the DMC-P(OEt) <sub>3</sub> prepared at various temperatures and without co-<br>CA.....                                                                                                                                                                                                     | 6         |
| <b>Fig. S3</b> FTIR spectra of the DMC-TEP prepared using various temperature. ....                                                                                                                                                                                                                                        | 7         |
| <b>Fig. S4</b> FTIR spectra of the DMC-TEP prepared using various amounts of CA.....                                                                                                                                                                                                                                       | 7         |
| <b>Fig. S5</b> FTIR spectra of the DMC- <i>t</i> BuOH prepared using various amounts of CA. ....                                                                                                                                                                                                                           | 8         |
| <b>Fig. S6</b> Expanded Zn 2p <sub>3</sub> XPS spectra: (a) DMC-pure, (b) DMC-DMMP, (c), (d) DMC-<br>DEP prepared at 30 and 90 °C, respectively, and (e), (f) DMC-P(OEt) <sub>3</sub> prepared at 30 and<br>70 °C, respectively.....                                                                                       | 8         |
| <b>Fig. S7</b> Expanded Co 2p <sub>3</sub> XPS spectra: (a) DMC-pure, (b) DMC-DMMP, (c), (d) DMC-<br>DEP prepared at 30 and 90 °C, respectively, and (e), (f) DMC-P(OEt) <sub>3</sub> prepared at 30 and<br>70 °C, respectively.....                                                                                       | 9         |
| <b>Fig. S8</b> XRD patterns of the prepared DMC catalysts. ....                                                                                                                                                                                                                                                            | 9         |
| <b>Fig. S9</b> XRD patterns of the DMC-DEP and P(OEt) <sub>3</sub> prepared at various temperature. (○)<br>denote the monoclinic ( <i>P11m</i> ) phases. ....                                                                                                                                                              | 10        |
| <b>Fig. S10</b> XRD patterns of the DMC-TEP and DMC-DEP prepared using various amounts of<br>CAs. (□), and (○) denote the cubic ( <i>Fm-3m</i> ), and monoclinic ( <i>P11m</i> ) phases, respectively.<br>.....                                                                                                            | 10        |
| <b>Fig. S11</b> SEM images of the DMC-pure and the optimized DMC-DEP catalysts.....                                                                                                                                                                                                                                        | 11        |
| <b>Fig. S12</b> TGA curve of the prepared DMC catalysts .....                                                                                                                                                                                                                                                              | 11        |
| <b>1.2 Catalytic reaction .....</b>                                                                                                                                                                                                                                                                                        | <b>12</b> |
| <b>Fig. S13</b> Reaction rate curves of the ROP of PO obtained by DMC-P(OEt) <sub>3</sub> prepared using<br>various amount of CA and catalyst preparation temperature. Reaction condition: Catalyst<br>loading ( <i>n</i> <sub>Zn</sub> ) = 0.3 mmol, PO = 3.5 mol, PPG-600 = 50 mmol, <i>T</i> <sub>P</sub> = 115 °C..... | 12        |
| <b>Fig. S14</b> Reaction rate curves of the ROP of PO obtained by DMC-DEP prepared using<br>various amount of CA and catalyst preparation temperature. Reaction condition: Catalyst<br>loading ( <i>n</i> <sub>Zn</sub> ) = 0.3 mmol, PO = 3.5 mol, PPG-600 = 50 mmol, <i>T</i> <sub>P</sub> = 115 °C.....                 | 12        |
| <b>Fig. S15</b> Reaction rate curves of the ROP of PO obtained by DMC-TEP prepared using<br>various amount of CA and catalyst preparation temperature. Reaction condition: Catalyst<br>loading ( <i>n</i> <sub>Zn</sub> ) = 0.3 mmol, PO = 3.5 mol, PPG-600 = 50 mmol, <i>T</i> <sub>P</sub> = 115 °C.....                 | 13        |
| <b>Fig. S16</b> Reaction rate curves of the ROP of PO obtained by DMC-TEP prepared using<br>various co-CAs. Reaction condition: Catalyst loading ( <i>n</i> <sub>Zn</sub> ) = 0.3 mmol, PO = 3.5 mol, PPG-<br>400 = 50 mmol, <i>T</i> <sub>P</sub> = 115 °C. ....                                                          | 13        |

|                                                                                                                                                                                                                                                                                                                        |    |
|------------------------------------------------------------------------------------------------------------------------------------------------------------------------------------------------------------------------------------------------------------------------------------------------------------------------|----|
| <b>Fig. S17</b> Reaction rate curves of the ROP of PO obtained by DMC- <i>t</i> BuOH prepared using various amount of CA. Reaction condition: Catalyst loading ( $n_{Zn}$ ) = 0.3 mmol, PO = 3.5 mol, PPG-400 = 50 mmol, $T_P$ = 115 °C. ....                                                                          | 14 |
| <b>Fig. S18</b> $^1H$ NMR spectrum (400 MHz, $CDCl_3$ ) of the PPG produced by DMC-DMP. Polymerization condition: Catalyst amount = 100 mg, PO = 200 mol, PPG-600 = 50 mmol, $T_P$ = 115 °C. ....                                                                                                                      | 14 |
| <b>Fig. S19</b> $^1H$ NMR spectrum (400 MHz, $CDCl_3$ ) of the PPG produced by DMC-DEP. Polymerization Reaction condition: Catalyst amount = 100 mg, PO = 200 mol, PPG-600 = 50 mmol, $T_P$ = 115 °C. ....                                                                                                             | 15 |
| <b>Fig. S20</b> $^1H$ NMR spectrum (400 MHz, $CDCl_3$ ) of the PPG produced by DMC-D <i>t</i> BuP. Polymerization Reaction condition: Catalyst amount = 100 mg, PO = 200 mol, PPG-600 = 50 mmol, $T_P$ = 115 °C. ....                                                                                                  | 16 |
| <b>Fig. S21</b> $^1H$ NMR spectrum (400 MHz, $CDCl_3$ ) of the PPG produced by DMC-P(OMe) <sub>3</sub> . Polymerization Reaction condition: Catalyst amount = 100 mg, PO = 200 mol, PPG-600 = 50 mmol, $T_P$ = 115 °C. ....                                                                                            | 17 |
| <b>Fig. S22</b> $^1H$ NMR spectrum (400 MHz, $CDCl_3$ ) of the PPG produced by DMC-P(OEt) <sub>3</sub> . Polymerization Reaction condition: Catalyst amount = 100 mg, PO = 200 mol, PPG-600 = 50 mmol, $T_P$ = 115 °C. ....                                                                                            | 18 |
| <b>Fig. S23</b> $^1H$ NMR spectrum (400 MHz, $CDCl_3$ ) of the PPG produced by DMC-TEP. Polymerization Reaction condition: Catalyst amount = 100 mg, PO = 200 mol, PPG-600 = 50 mmol, $T_P$ = 115 °C. ....                                                                                                             | 19 |
| <b>Fig. S24</b> $^1H$ NMR spectrum (400 MHz, $CDCl_3$ ) of the PPG produced by DMC-TIP. Polymerization Reaction condition: Catalyst amount = 100 mg, PO = 200 mol, PPG-600 = 50 mmol, $T_P$ = 115 °C. ....                                                                                                             | 20 |
| <b>Fig. S25</b> $^1H$ NMR spectrum (400 MHz, $CDCl_3$ ) of the crude reaction mixture of the ROP of PO and CO <sub>2</sub> obtained by DMC-DEP. Polymerization Reaction condition: Catalyst amount = 50 mg, PO = 0.34 mol, PPG-600 = 2.5 mmol, toluene = 10 mL, $P_{CO_2}$ = 5 bar, $T_P$ = 105 °C, $t_P$ = 3 h. ....  | 21 |
| <b>Fig. S26</b> $^1H$ NMR spectrum (400 MHz, $CDCl_3$ ) of the crude reaction mixture of the ROP of PO and CO <sub>2</sub> obtained by DMC-DEP. Polymerization Reaction condition: Catalyst amount = 50 mg, PO = 0.34 mol, PPG-600 = 2.5 mmol, toluene = 10 mL, $P_{CO_2}$ = 10 bar, $T_P$ = 105 °C, $t_P$ = 3 h. .... | 22 |
| <b>Fig. S27</b> $^1H$ NMR spectrum (400 MHz, $CDCl_3$ ) of the polycarbonate polyol obtained by DMC- DEP. Polymerization Reaction condition: Catalyst amount = 50 mg, PO = 0.34 mol, PPG-600 = 2.5 mmol, toluene = 10 mL, $P_{CO_2}$ = 10 bar, $T_P$ = 105 °C, $t_P$ = 3 h. ....                                       | 23 |
| <b>Fig. S28</b> $^1H$ NMR spectrum (400 MHz, $CDCl_3$ ) of the crude reaction mixture of the ROP of PO and CO <sub>2</sub> obtained by DMC-DEP. Polymerization Reaction condition: Catalyst amount = 50 mg, PO = 0.34 mol, PPG-600 = 2.5 mmol, toluene = 10 mL, $P_{CO_2}$ = 20 bar, $T_P$ = 105 °C, $t_P$ = 3 h. .... | 24 |

|                                                                                                                                                                                                                                                                                                                                                                                                   |    |
|---------------------------------------------------------------------------------------------------------------------------------------------------------------------------------------------------------------------------------------------------------------------------------------------------------------------------------------------------------------------------------------------------|----|
| <b>Fig. S29</b> $^1\text{H}$ NMR spectrum (400 MHz, $\text{CDCl}_3$ ) of the polycarbonate polyol obtained by DMC- DEP. Polymerization Reaction condition: Catalyst amount = 50 mg , PO = 0.34 mol, PPG-600 = 2.5 mmol, toluene = 10 mL, $P_{\text{CO}_2}$ = 20 bar, $T_{\text{P}}$ = 105 $^\circ\text{C}$ , $t_{\text{P}}$ = 3 h.....                                                            | 25 |
| <b>Fig. S30</b> $^1\text{H}$ NMR spectrum (400 MHz, $\text{CDCl}_3$ ) of the crude reaction mixture of the ROP of PO and $\text{CO}_2$ obtained by DMC-DEP. Polymerization Reaction condition: Catalyst amount = 50 mg , PO = 0.34 mol, PPG-600 = 0.25 mmol, toluene = 10 mL, $P_{\text{CO}_2}$ = 30 bar, $T_{\text{P}}$ = 105 $^\circ\text{C}$ , $t_{\text{P}}$ = 3 h. ....                      | 27 |
| <b>Fig. S31</b> $^1\text{H}$ NMR spectrum (400 MHz, $\text{CDCl}_3$ ) of the polycarbonate polyol obtained by DMC- DEP. Polymerization Reaction condition: Catalyst amount = 50 mg , PO = 0.34 mol, PPG-600 = 0.25 mmol, toluene = 10 mL, $P_{\text{CO}_2}$ = 30 bar, $T_{\text{P}}$ = 105 $^\circ\text{C}$ , $t_{\text{P}}$ = 3 h.....                                                           | 27 |
| <b>Fig. S32</b> $^1\text{H}$ NMR spectrum (400 MHz, $\text{CDCl}_3$ ) of the crude reaction mixture of the ROP of PO and $\text{CO}_2$ obtained by DMC-DEP. Polymerization Reaction condition: Catalyst amount = 50 mg , PO = 0.34 mol, PPG-600 = 2.5 mmol, toluene = 10 mL, $P_{\text{CO}_2}$ = 30 bar, $T_{\text{P}}$ = 105 $^\circ\text{C}$ , $t_{\text{P}}$ = 3 h. ....                       | 28 |
| <b>Fig. S33</b> $^1\text{H}$ NMR spectrum (400 MHz, $\text{CDCl}_3$ ) of the polycarbonate polyol obtained by DMC- DEP. Polymerization Reaction condition: Catalyst amount = 50 mg , PO = 0.34 mol, PPG-600 = 2.5 mmol, toluene = 10 mL, $P_{\text{CO}_2}$ = 30 bar, $T_{\text{P}}$ = 105 $^\circ\text{C}$ , $t_{\text{P}}$ = 3 h.....                                                            | 29 |
| <b>Fig. S34</b> $^1\text{H}$ NMR spectrum (400 MHz, $\text{CDCl}_3$ ) of the crude reaction mixture of the ROP of PO and $\text{CO}_2$ obtained by DMC-DEP. Polymerization Reaction condition: Catalyst amount = 50 mg , PO = 0.34 mol, PPG-600 = 12.5 mmol, toluene = 10 mL, $P_{\text{CO}_2}$ = 30 bar, $T_{\text{P}}$ = 105 $^\circ\text{C}$ , $t_{\text{P}}$ = 3 h. ....                      | 30 |
| <b>Fig. S35</b> $^1\text{H}$ NMR spectrum (400 MHz, $\text{CDCl}_3$ ) of the polycarbonate polyol obtained by DMC- DEP. Polymerization Reaction condition: : Catalyst amount = 50 mg , PO = 0.34 mol, PPG-600 = 12.5 mmol, toluene = 10 mL, $P_{\text{CO}_2}$ = 30 bar, $T_{\text{P}}$ = 105 $^\circ\text{C}$ , $t_{\text{P}}$ = 3 h. ....                                                        | 31 |
| <b>Fig. S36</b> $^1\text{H}$ NMR spectrum (400 MHz, $\text{CDCl}_3$ ) of the crude reaction mixture of the ROP of PO and $\text{CO}_2$ obtained by DMC- $\text{P}(\text{OEt})_3$ . Polymerization Reaction condition: Catalyst amount = 50 mg , PO = 0.34 mol, PPG-600 = 2.5 mmol, toluene = 10 mL, $P_{\text{CO}_2}$ = 30 bar, $T_{\text{P}}$ = 105 $^\circ\text{C}$ , $t_{\text{P}}$ = 3 h..... | 32 |
| <b>Fig. S37</b> $^1\text{H}$ NMR spectrum (400 MHz, $\text{CDCl}_3$ ) of the polycarbonate polyol obtained by DMC- $\text{P}(\text{OEt})_3$ . Polymerization Reaction condition: : Catalyst amount = 50 mg , PO = 0.34 mol, PPG-600 = 2.5 mmol, toluene = 10 mL, $P_{\text{CO}_2}$ = 30 bar, $T_{\text{P}}$ = 105 $^\circ\text{C}$ , $t_{\text{P}}$ = 3 h. ....                                   | 33 |
| <b>Fig. S38</b> $^1\text{H}$ NMR spectrum (400 MHz, $\text{CDCl}_3$ ) of the crude reaction mixture of the ROP of PO and $\text{CO}_2$ obtained by DMC-TEP. Polymerization Reaction condition: : Catalyst amount = 50 mg , PO = 0.34 mol, PPG-600 = 2.5 mmol, toluene = 10 mL, $P_{\text{CO}_2}$ = 30 bar, $T_{\text{P}}$ = 105 $^\circ\text{C}$ , $t_{\text{P}}$ = 3 h.....                      | 34 |
| <b>Fig. S39</b> $^1\text{H}$ NMR spectrum (400 MHz, $\text{CDCl}_3$ ) of the polycarbonate polyol obtained by DMC- TEP. Polymerization Reaction condition: : Catalyst amount = 50 mg , PO = 0.34 mol, PPG-600 = 2.5 mmol, toluene = 10 mL, $P_{\text{CO}_2}$ = 30 bar, $T_{\text{P}}$ = 105 $^\circ\text{C}$ , $t_{\text{P}}$ = 3 h.....                                                          | 35 |
| <b>Fig. S40</b> $^1\text{H}$ NMR spectrum (400 MHz, $\text{CDCl}_3$ ) of the crude reaction mixture of the ROP of PO and $\text{CO}_2$ obtained by DMC-TEP without co-CA. Polymerization Reaction condition: :                                                                                                                                                                                    |    |

|                                                                                                                                                                                                                                                                                                 |    |
|-------------------------------------------------------------------------------------------------------------------------------------------------------------------------------------------------------------------------------------------------------------------------------------------------|----|
| Catalyst amount = 50 mg , PO = 0.34 mol, PPG-600 = 2.5 mmol, toluene = 10 mL, $P_{CO_2}$ = 30 bar, $T_P$ = 105 °C, $t_P$ = 3 h .....                                                                                                                                                            | 36 |
| <b>Fig. S41</b> $^1H$ NMR spectrum (400 MHz, $CDCl_3$ ) of the polycarbonate polyol obtained by DMC- TEP without co-CA. Polymerization Reaction condition: Catalyst amount = 50 mg , PO = 0.34 mol, PPG-600 = 2.5 mmol, toluene = 10 mL, $P_{CO_2}$ = 30 bar, $T_P$ = 105 °C, $t_P$ = 3 h. .... | 37 |
| <b>Fig. S42</b> $^1H$ NMR spectra (400 MHz, $CDCl_3$ ) of the crude reaction mixture of CL: polymerization using EG initiator and DMC-DEP catalyst. Reaction Conditions: catalyst amount = 10 mg ( $[Zn]_0$ = 30 mM), $[CL]_0$ = 9 M, $[CL]_0/[EG]_0$ = 10, $T_P$ = 160 °C.....                 | 38 |
| <b>Fig. S43</b> 2D DOSY NMR Spectra (600 MHz, $CDCl_3$ ) of (a) PCL 2000 and (b) PPG. Reaction condition: Catalyst amount = 50 mg, $T_P$ = 115 °C. ....                                                                                                                                         | 38 |
| <b>Fig. S44</b> $^1H$ -NMR spectra of PPG, PTMG and PPG-PTMG block copolymer (BCP-5).....                                                                                                                                                                                                       | 39 |
| <b>Fig. S45</b> 2D DOSY NMR Spectra (600 MHz, $CDCl_3$ ) of (a) PPG and PTMG mixture and (b) BCP-5. Reaction condition: Catalyst amount = 50 mg, $T_P$ = 115 °C.....                                                                                                                            | 39 |
| <b>Fig. S46</b> GPC curves of the block copolymer obtained by batch ROP initiated by (a) PCL and (b) PTMG.....                                                                                                                                                                                  | 40 |
| <b>2. Supplementary tables</b> .....                                                                                                                                                                                                                                                            | 41 |
| <b>Table S1.</b> DMC catalysts prepared using $ZnCl_2$ (15 mmol), $K_3Co(CN)_6$ (1.5 mmol), and various type of OPC CAs. ....                                                                                                                                                                   | 41 |
| <b>Table S2</b> Properties of triblock copolymers as co-complexing agent.....                                                                                                                                                                                                                   | 42 |
| <b>Table S3</b> Summary of the FTIR results of DMC catalysts prepared by different OPC CAs                                                                                                                                                                                                      | 43 |
| <b>Table S4</b> Summary of the FTIR results of optimized DMC catalysts prepared by different temperature .....                                                                                                                                                                                  | 44 |
| <b>Table S5</b> Summary of the XPS results of DMC catalysts prepared by different CAs.....                                                                                                                                                                                                      | 45 |
| <b>Table S6</b> Results for the semi-batch ROP of PO using various DMC catalysts.....                                                                                                                                                                                                           | 46 |
| <b>3. References</b> .....                                                                                                                                                                                                                                                                      | 48 |

## 1. Supplementary figures

### 1.1 Characterization of DMC catalysts

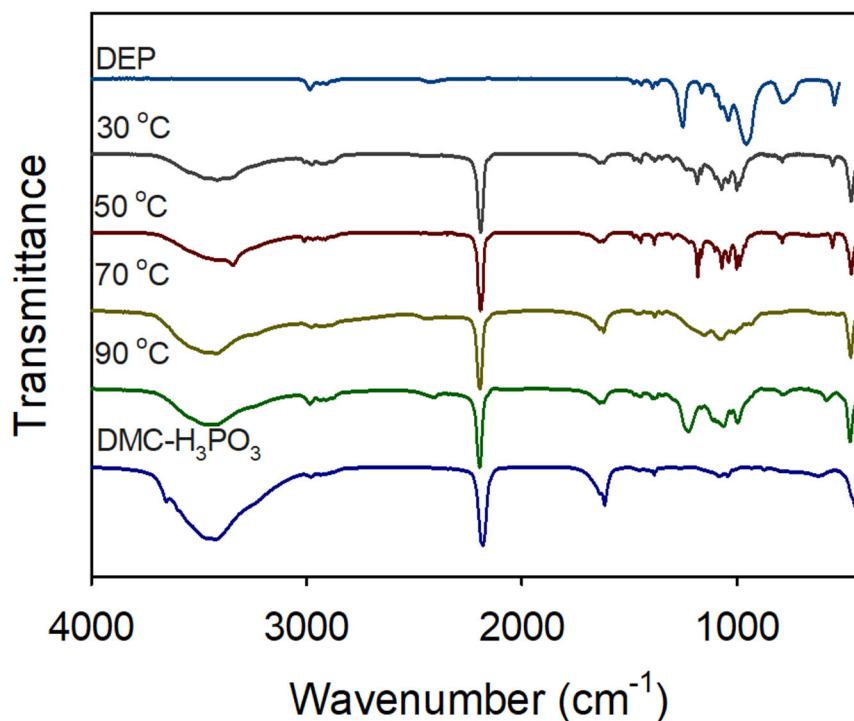

**Fig. S1** FTIR spectra of the DMC-DEP prepared using various temperature and DMC- $\text{H}_3\text{PO}_3$ .

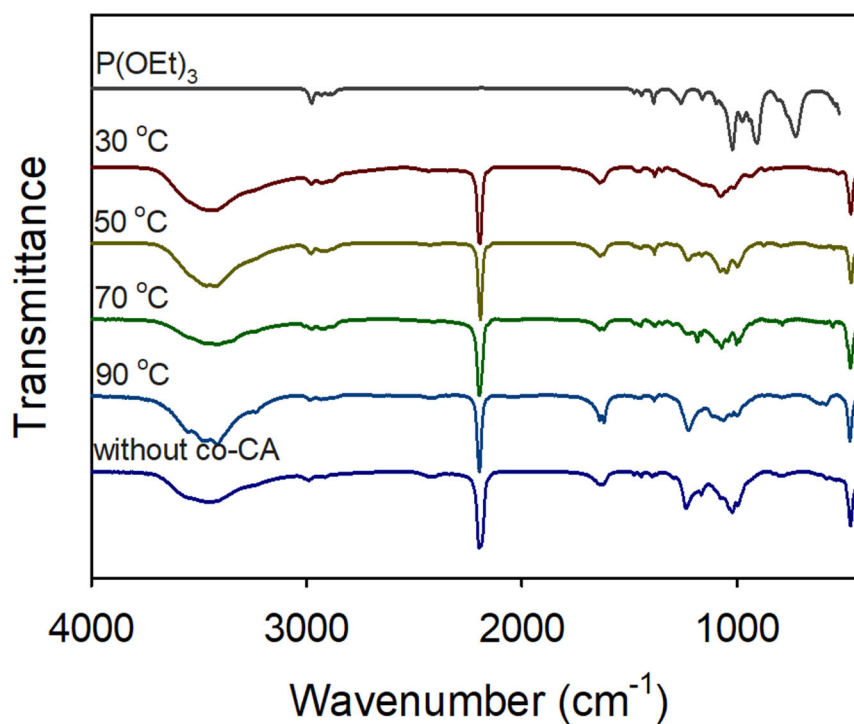

**Fig. S2** FTIR spectra of the DMC- $\text{P}(\text{OEt})_3$  prepared at various temperatures and without co-CA.

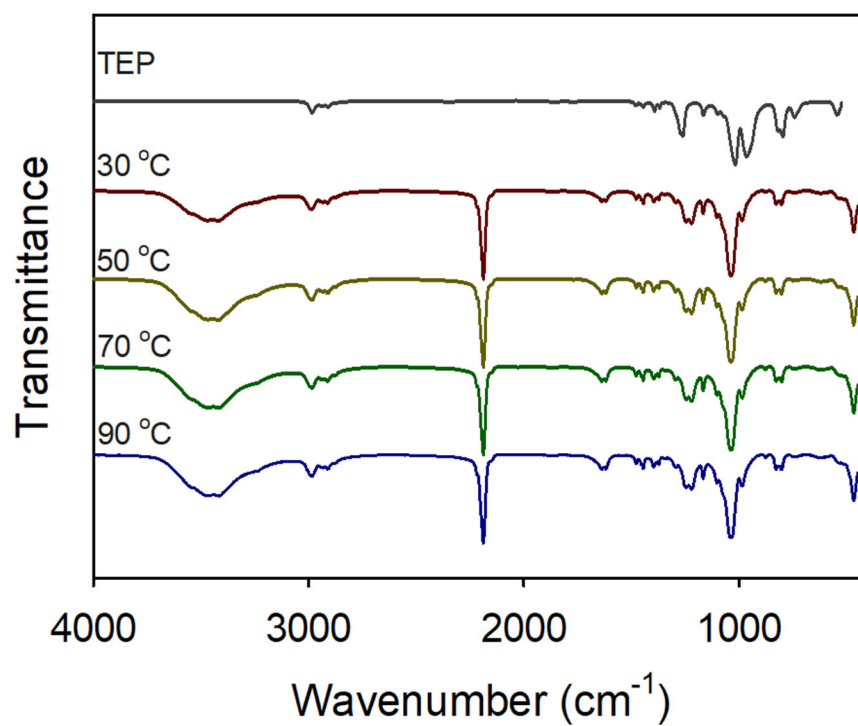

**Fig. S3** FTIR spectra of the DMC-TEP prepared using various temperature.

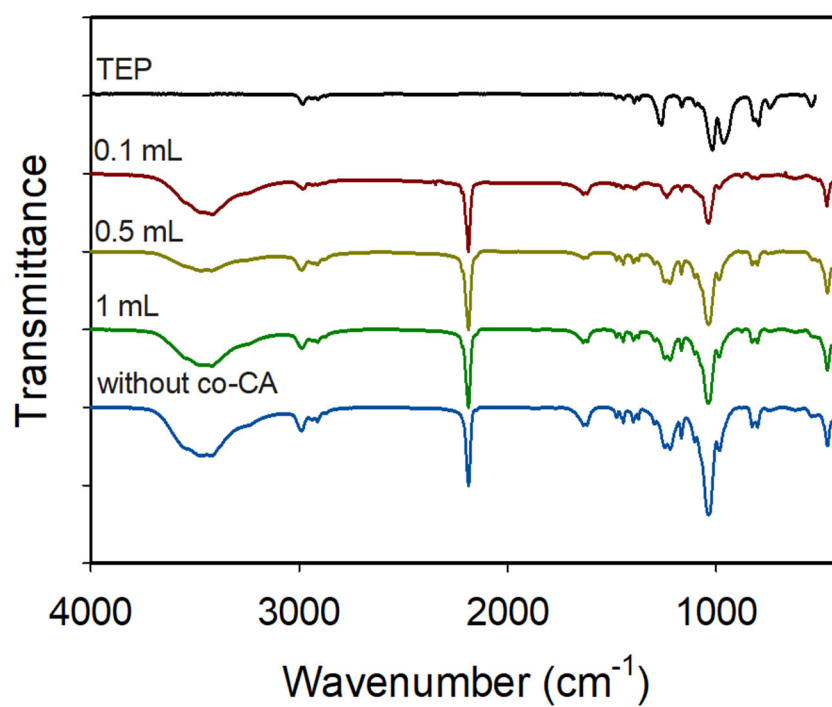

**Fig. S4** FTIR spectra of the DMC-TEP prepared using various amounts of CA.

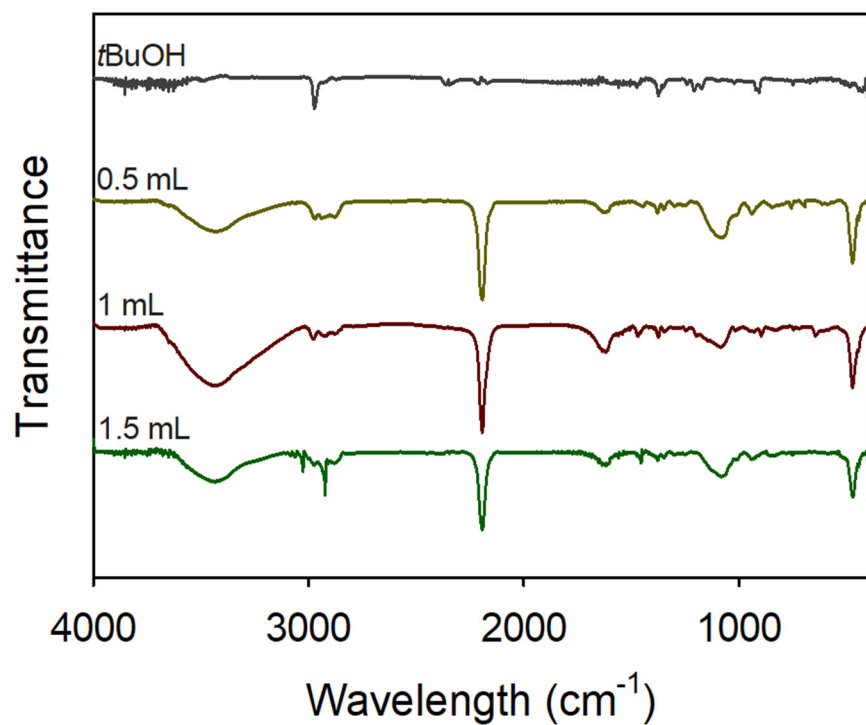

**Fig. S5** FTIR spectra of the DMC-*t*BuOH prepared using various amounts of CA.

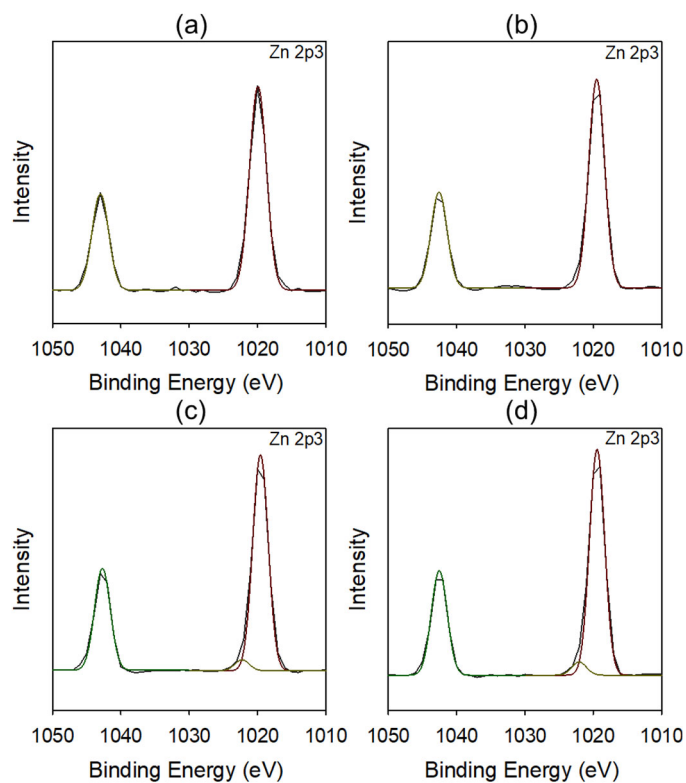

**Fig. S6** Expanded Zn 2p<sub>3</sub> XPS spectra: (a) DMC-pure, (b) DMC-DMMP, (c) DMC-DEP, and (d) DMC-P(OEt)<sub>3</sub>.



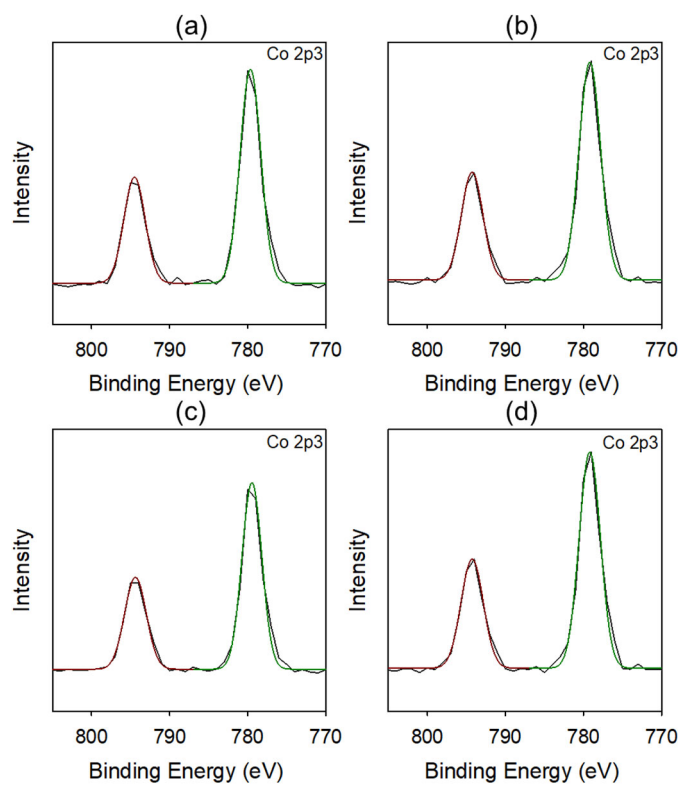

**Fig. S7** Expanded Co 2p<sub>3</sub> XPS spectra: (a) DMC-pure, (b) DMC-DMMP, (c) DMC-DEP, and (d) DMC-P(OEt)<sub>3</sub>.

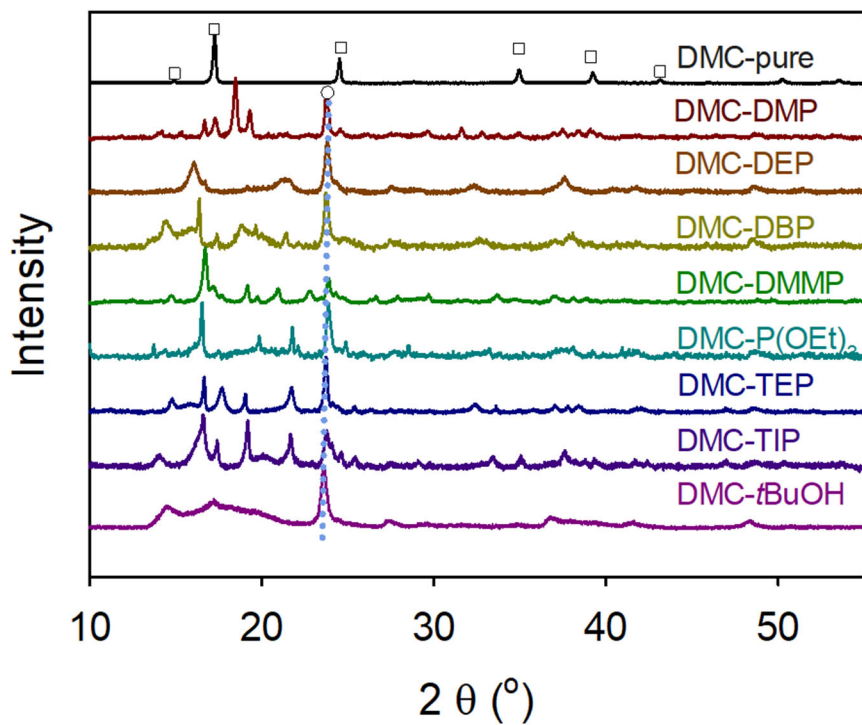

**Fig. S8** XRD patterns of the prepared DMC catalysts.

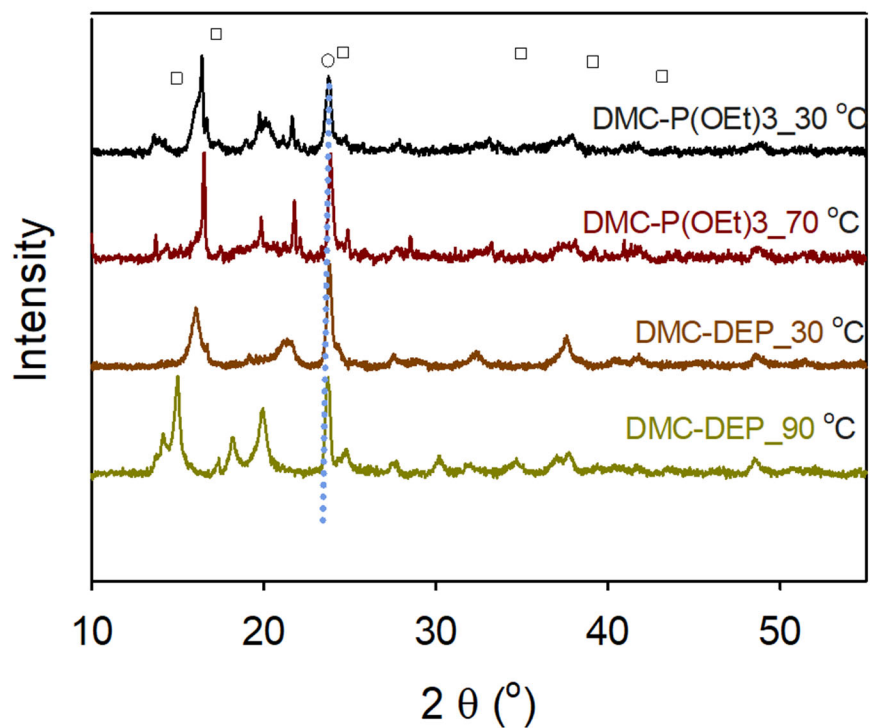

**Fig. S9** XRD patterns of the DMC-DEP and P(OEt)<sub>3</sub> prepared at various temperature. (○) denote the monoclinic (*P11m*) phases.

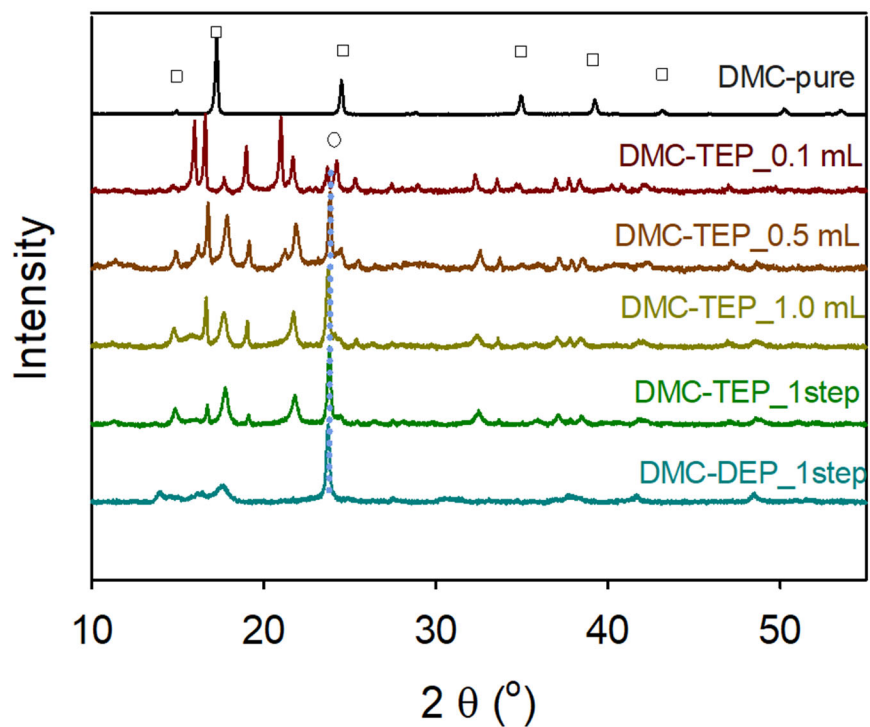

**Fig. S10** XRD patterns of the DMC-TEP and DMC-DEP prepared using various amounts of CAs. (□), and (○) denote the cubic (*Fm-3m*), and monoclinic (*P11m*) phases, respectively.

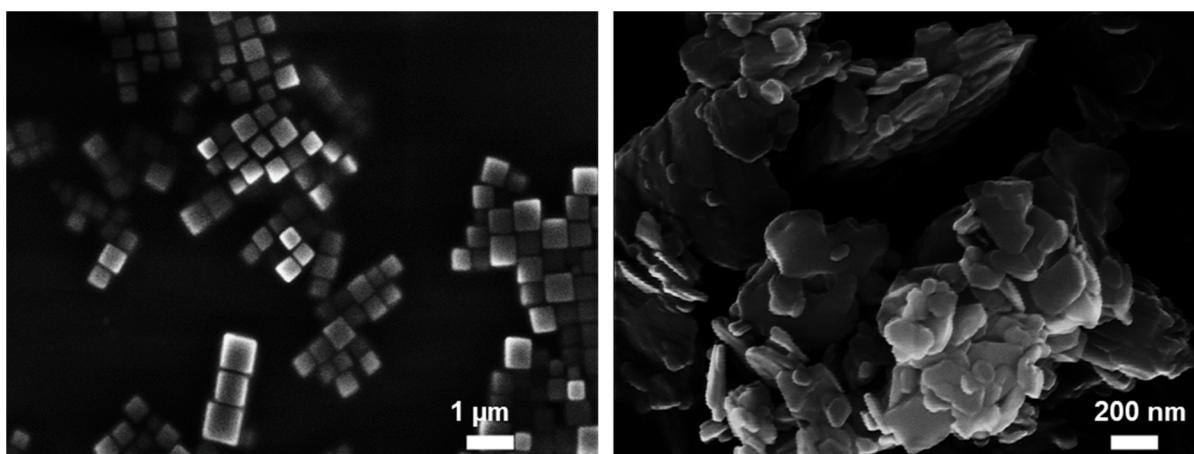

**Fig. S11** SEM images of the DMC-pure and the optimized DMC-DEP catalysts.

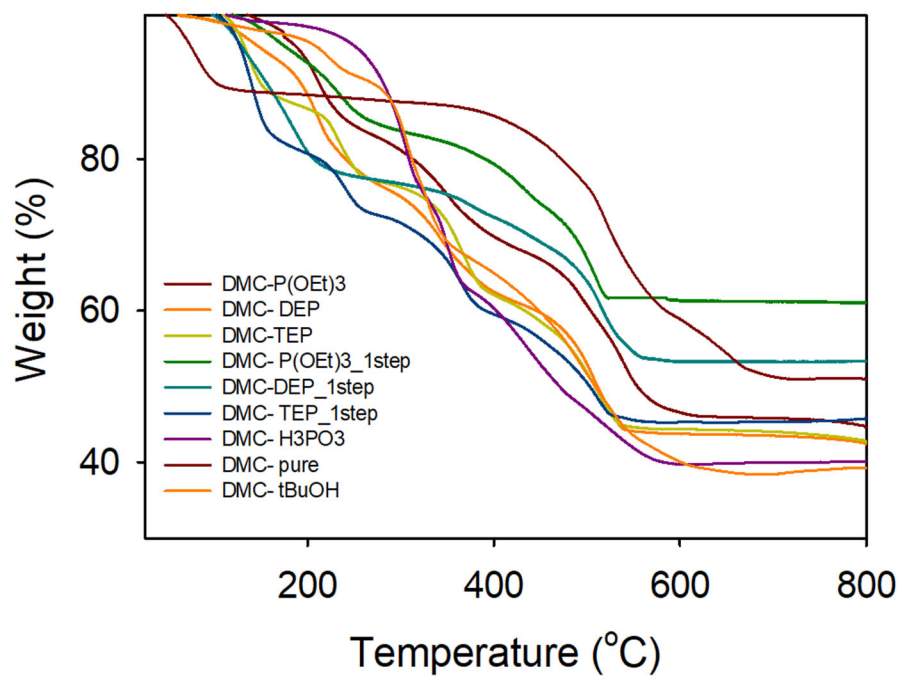

**Fig. S12** TGA curve of the prepared DMC catalysts

## 1.2 Catalytic reaction

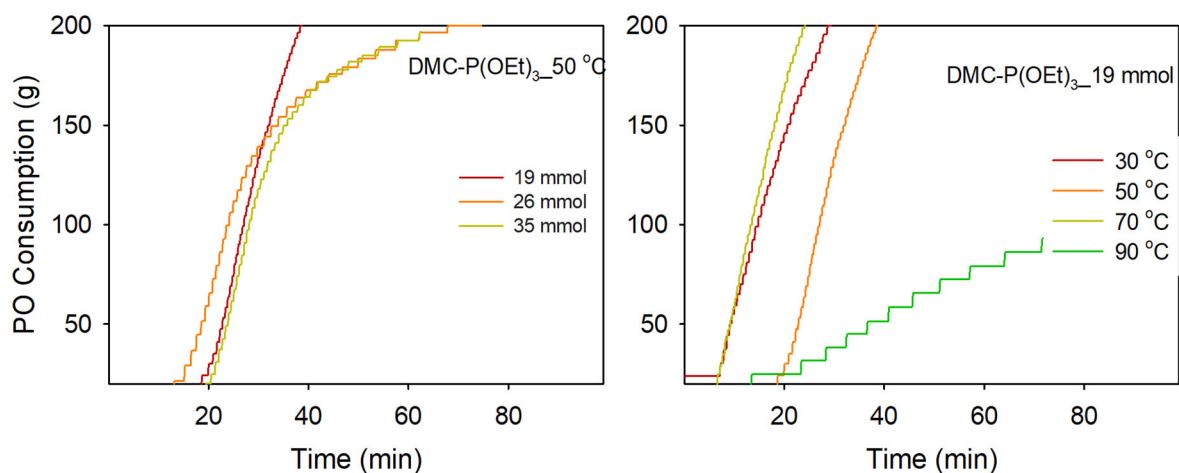

**Fig. S13** Reaction rate curves of the ROP of PO obtained by DMC-P(OEt)<sub>3</sub> prepared using various amount of CA and catalyst preparation temperature. Reaction condition: Catalyst loading ( $n_{\text{Zn}}$ ) = 0.3 mmol, PO = 3.5 mol, PPG-600 = 50 mmol,  $T_{\text{P}}$  = 115 °C.

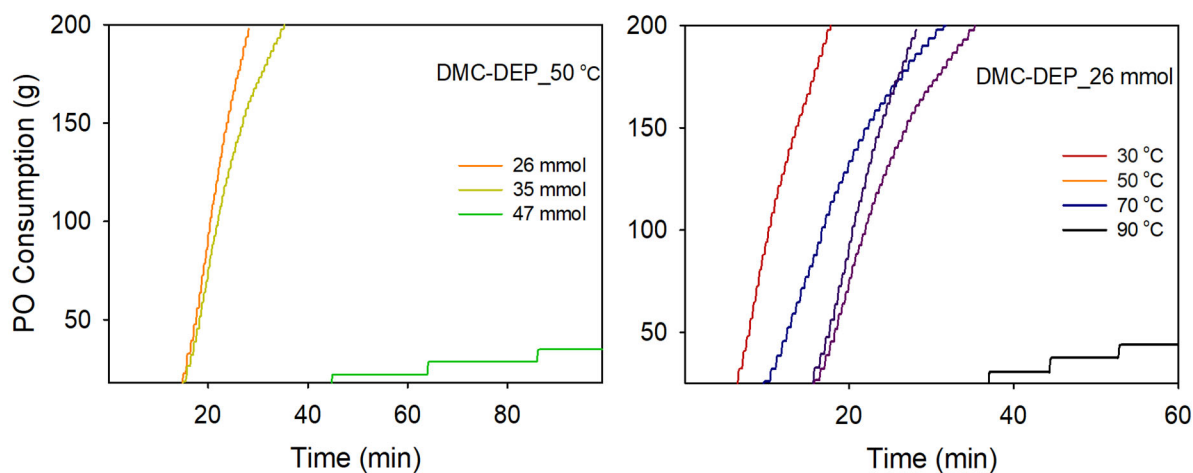

**Fig. S14** Reaction rate curves of the ROP of PO obtained by DMC-DEP prepared using various amount of CA and catalyst preparation temperature. Reaction condition: Catalyst loading ( $n_{\text{Zn}}$ ) = 0.3 mmol, PO = 3.5 mol, PPG-600 = 50 mmol,  $T_{\text{P}}$  = 115 °C.

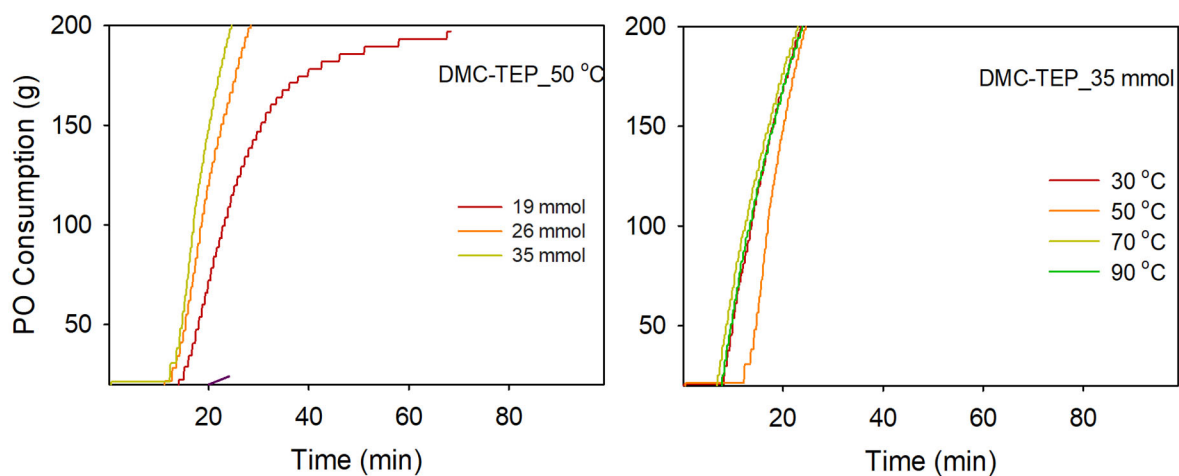

**Fig. S15** Reaction rate curves of the ROP of PO obtained by DMC-TEP prepared using various amount of CA and catalyst preparation temperature. Reaction condition: Catalyst loading ( $n_{\text{Zn}}$ ) = 0.3 mmol, PO = 3.5 mol, PPG-600 = 50 mmol,  $T_{\text{P}}$  = 115 °C.

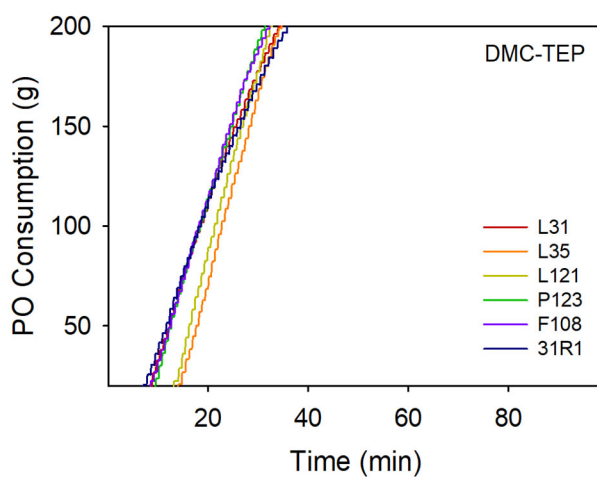

**Fig. S16** Reaction rate curves of the ROP of PO obtained by DMC-TEP prepared using various co-CAs. Reaction condition: Catalyst loading ( $n_{\text{Zn}}$ ) = 0.3 mmol, PO = 3.5 mol, PPG-400 = 50 mmol,  $T_{\text{P}}$  = 115 °C.

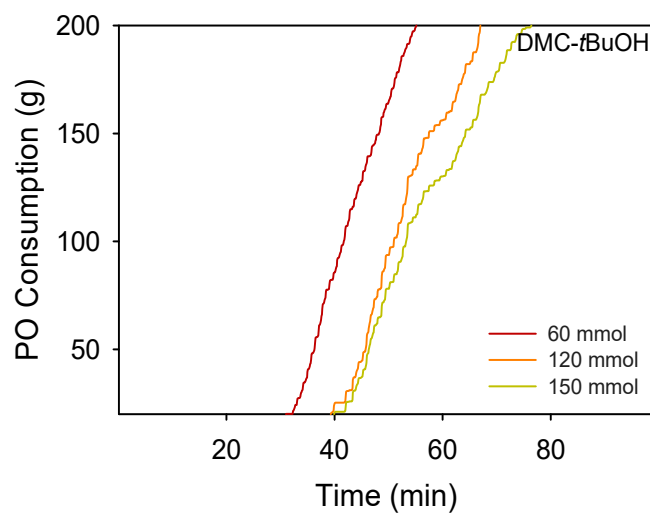

**Fig. S17** Reaction rate curves of the ROP of PO obtained by DMC-*t*BuOH prepared using various amount of CA. Reaction condition: Catalyst loading ( $n_{\text{Zn}}$ ) = 0.3 mmol, PO = 3.5 mol, PPG-400 = 50 mmol,  $T_{\text{P}}$  = 115 °C.

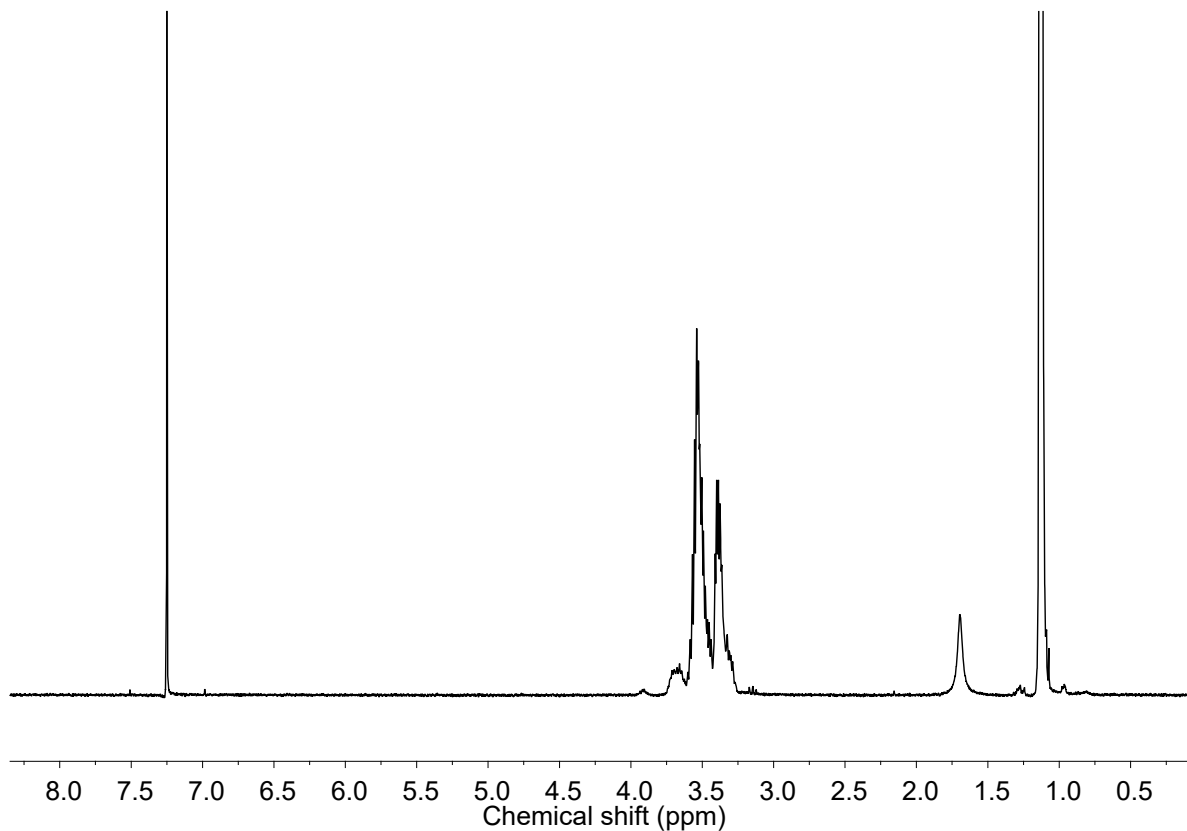

**Fig. S18**  $^1\text{H}$  NMR spectrum (400 MHz,  $\text{CDCl}_3$ ) of the PPG produced by DMC-DMP. Polymerization condition: Catalyst amount = 100 mg, PO = 200 mol, PPG-600 = 50 mmol,  $T_{\text{P}}$  = 115 °C.

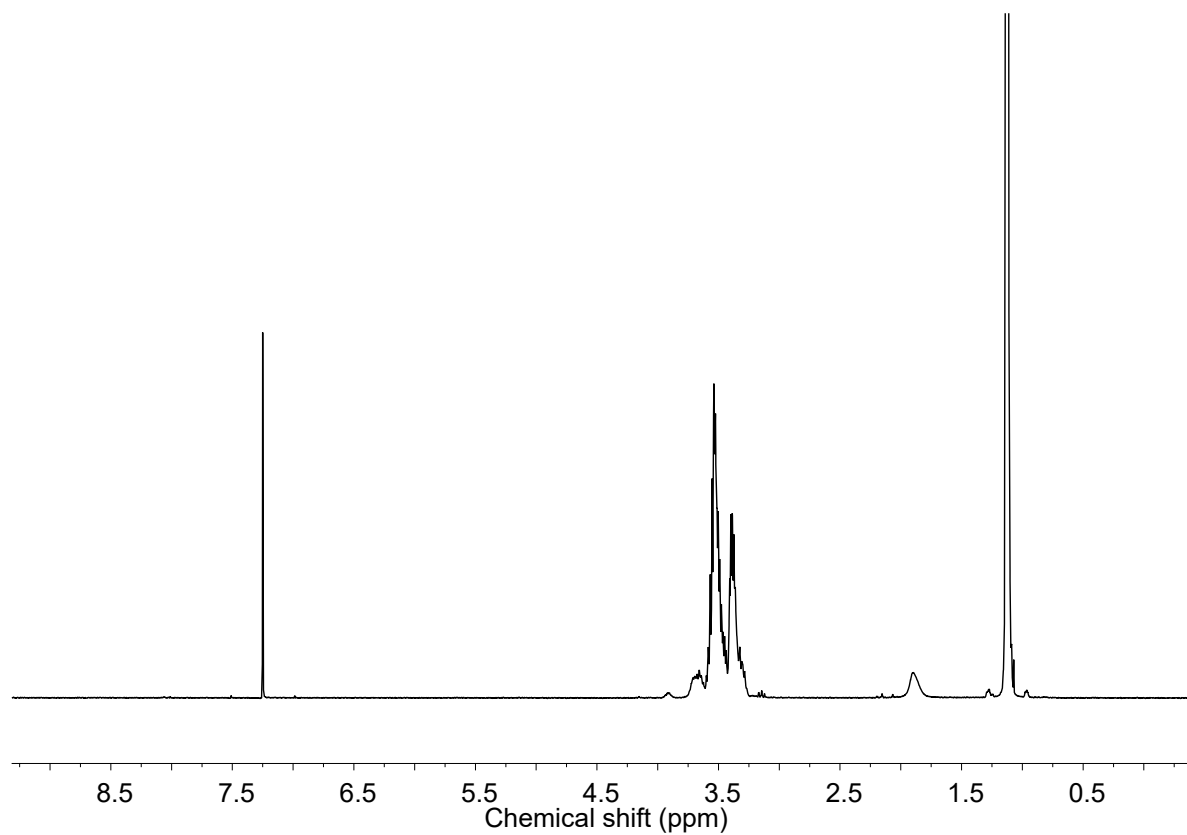

**Fig. S19**  $^1\text{H}$  NMR spectrum (400 MHz,  $\text{CDCl}_3$ ) of the PPG produced by DMC-DEP. Polymerization Reaction condition: Catalyst amount = 100 mg, PO = 200 mol, PPG-600 = 50 mmol,  $T_{\text{p}} = 115\text{ }^\circ\text{C}$ .

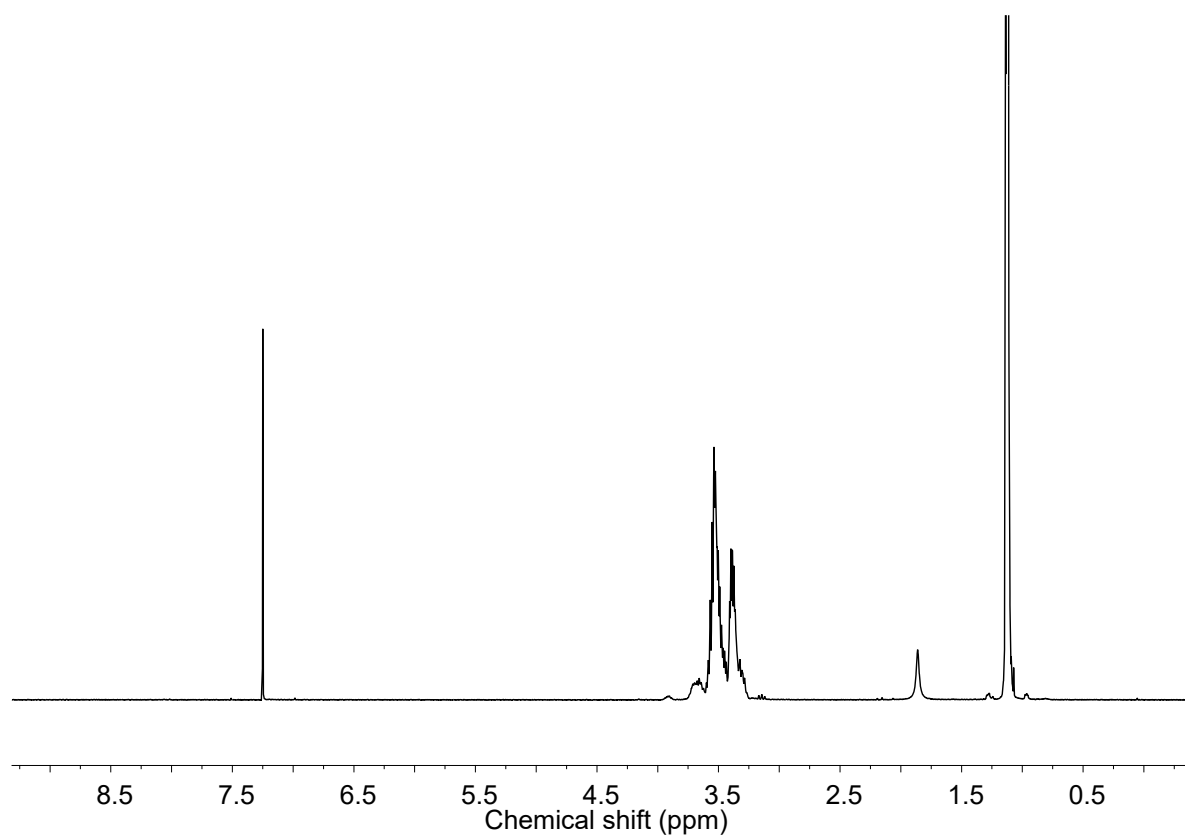

**Fig. S20**  $^1\text{H}$  NMR spectrum (400 MHz,  $\text{CDCl}_3$ ) of the PPG produced by DMC-DtBuP. Polymerization Reaction condition: Catalyst amount = 100 mg, PO = 200 mol, PPG-600 = 50 mmol,  $T_{\text{P}} = 115\text{ }^\circ\text{C}$ .



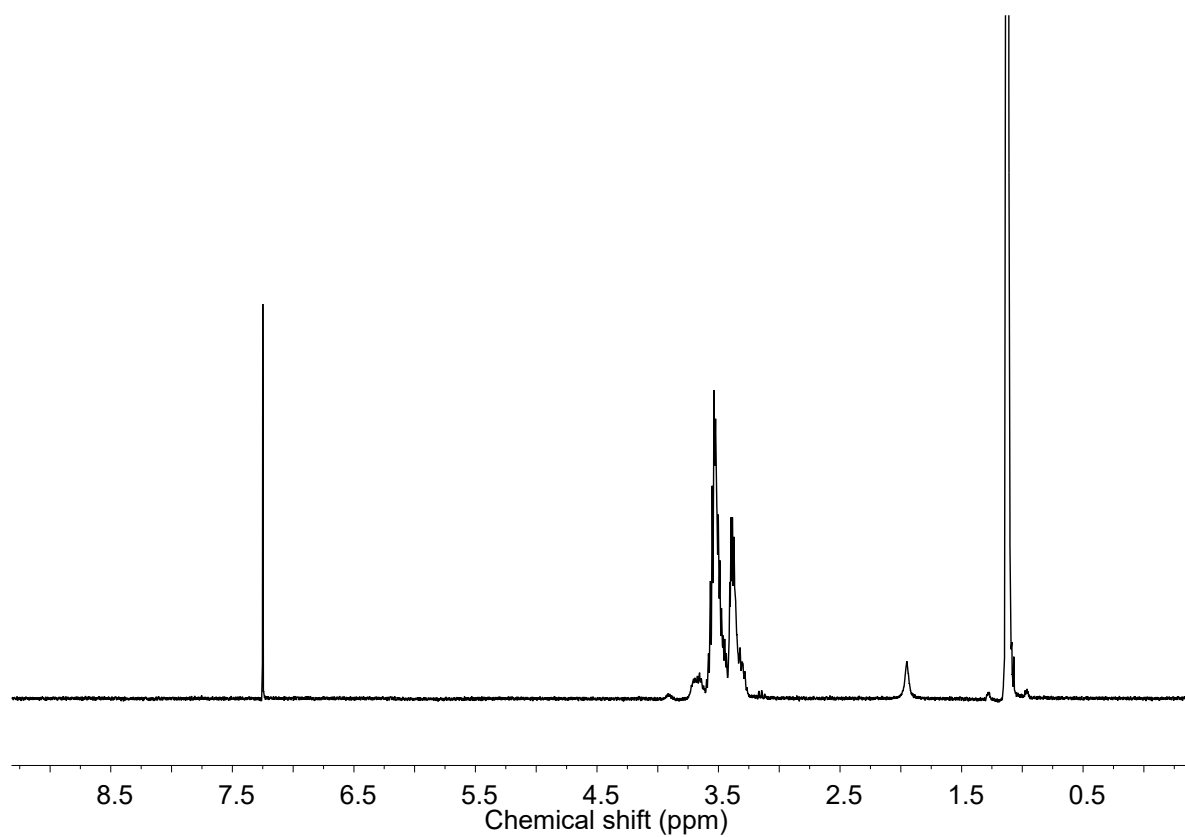

**Fig. S21**  $^1\text{H}$  NMR spectrum (400 MHz,  $\text{CDCl}_3$ ) of the PPG produced by  $\text{DMC-P(OMe)}_3$ . Polymerization Reaction condition: Catalyst amount = 100 mg, PO = 200 mol, PPG-600 = 50 mmol,  $T_p = 115\text{ }^\circ\text{C}$ .

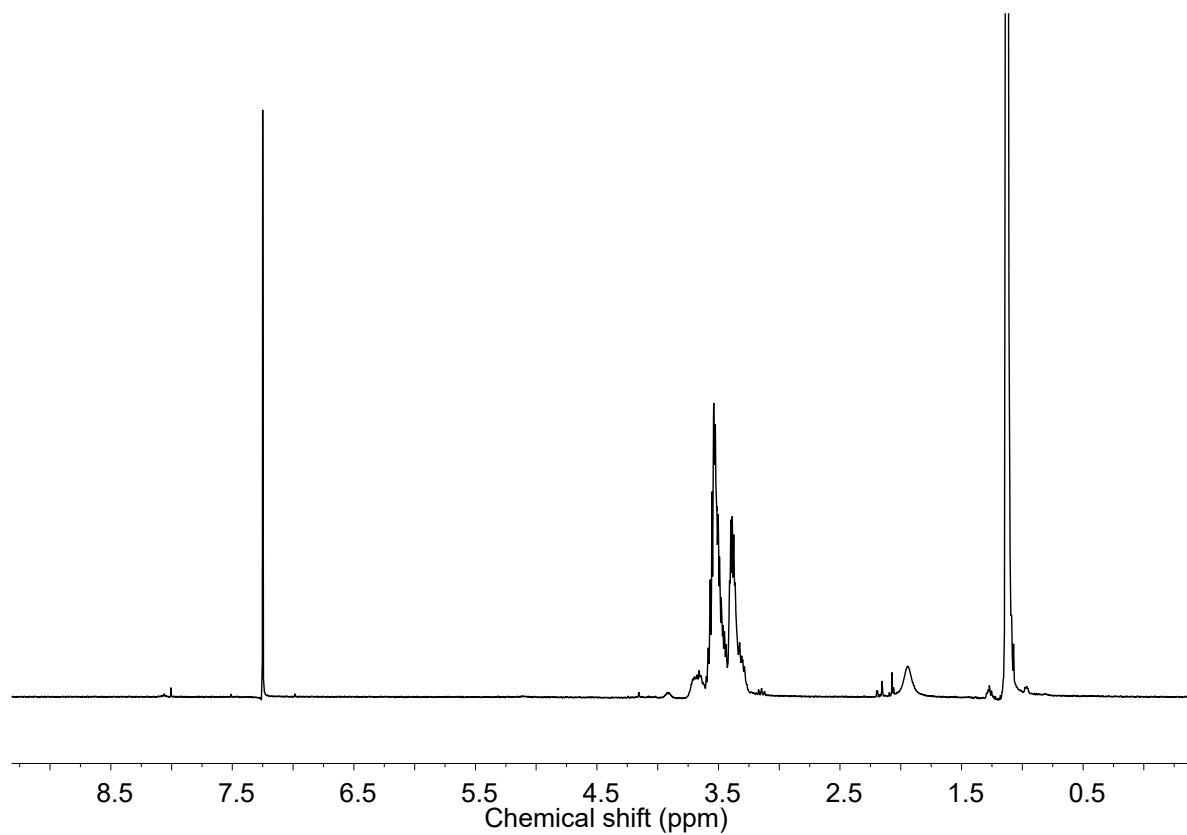

**Fig. S22**  $^1\text{H}$  NMR spectrum (400 MHz,  $\text{CDCl}_3$ ) of the PPG produced by  $\text{DMC-P(OEt)}_3$ . Polymerization Reaction condition: Catalyst amount = 100 mg, PO = 200 mol, PPG-600 = 50 mmol,  $T_P = 115\text{ }^\circ\text{C}$ .

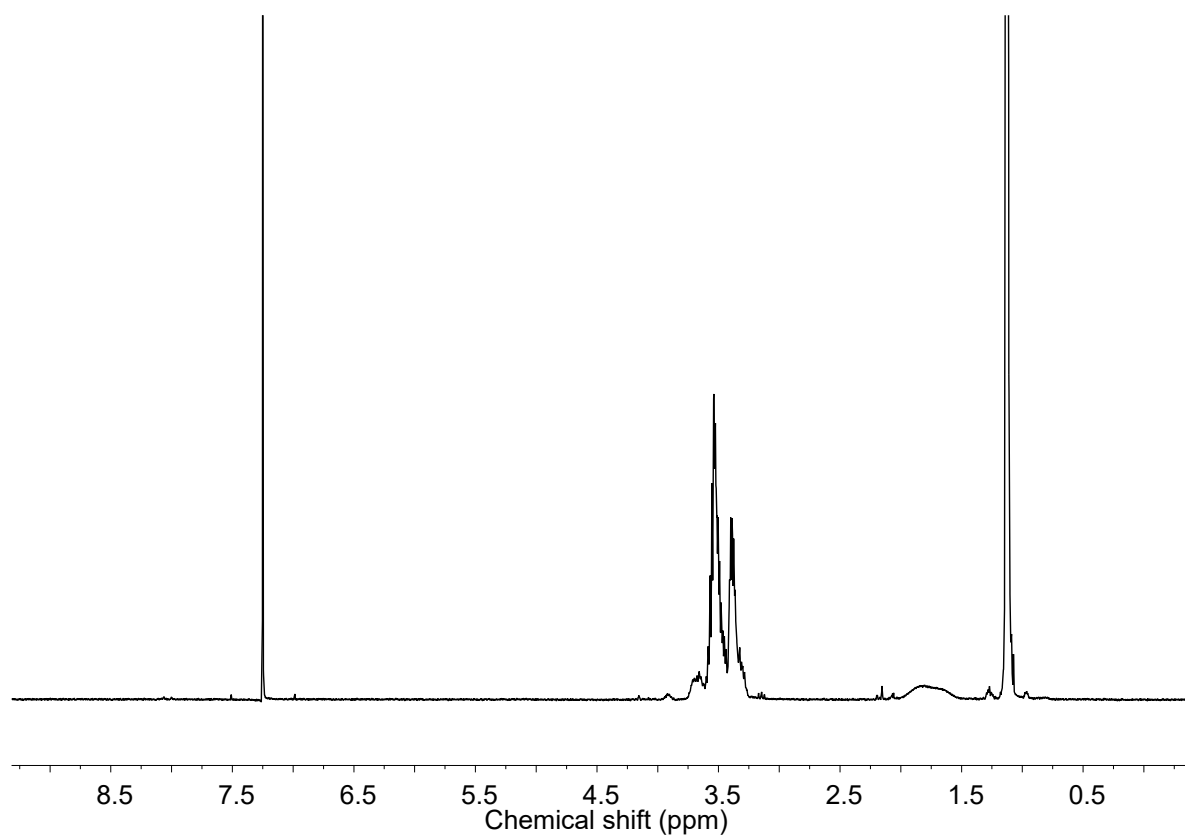

**Fig. S23**  $^1\text{H}$  NMR spectrum (400 MHz,  $\text{CDCl}_3$ ) of the PPG produced by DMC-TEP. Polymerization Reaction condition: Catalyst amount = 100 mg, PO = 200 mol, PPG-600 = 50 mmol,  $T_{\text{P}} = 115\text{ }^{\circ}\text{C}$ .

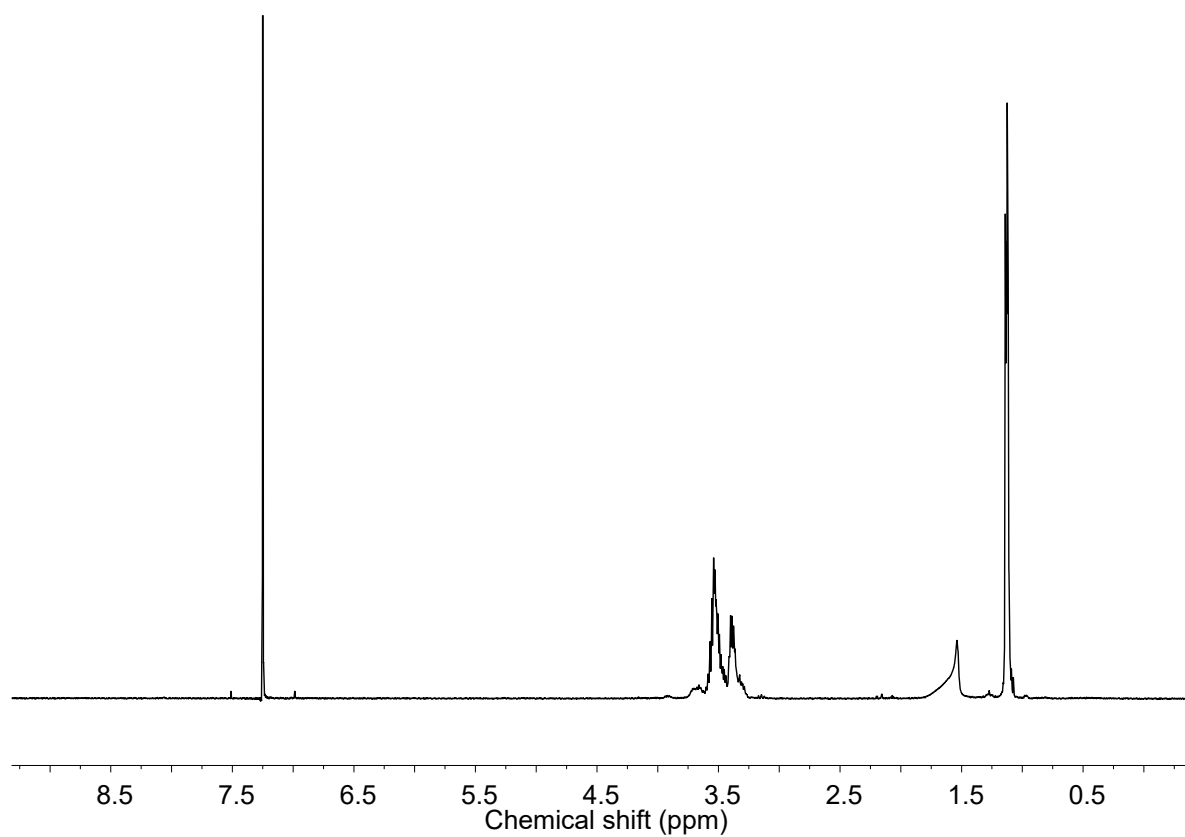

**Fig. S24**  $^1\text{H}$  NMR spectrum (400 MHz,  $\text{CDCl}_3$ ) of the PPG produced by DMC-TIP. Polymerization Reaction condition: Catalyst amount = 100 mg, PO = 200 mol, PPG-600 = 50 mmol,  $T_{\text{P}} = 115\text{ }^\circ\text{C}$ .

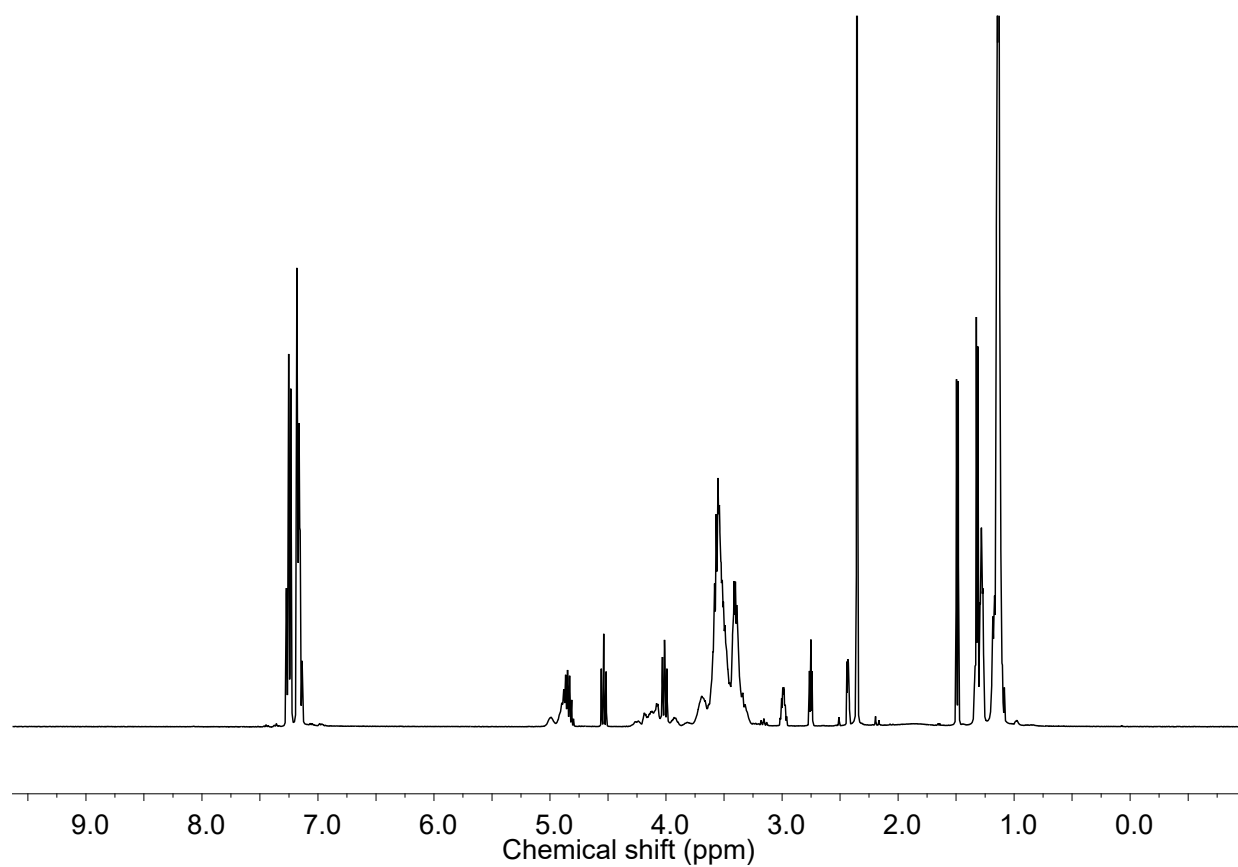

**Fig. S25** <sup>1</sup>H NMR spectrum (400 MHz, CDCl<sub>3</sub>) of the crude reaction mixture of the ROP of PO and CO<sub>2</sub> obtained by DMC-DEP. Polymerization Reaction condition: Catalyst amount = 50 mg , PO = 0.34 mol, PPG-600 = 2.5 mmol, toluene = 10 mL,  $P_{\text{CO}_2}$  = 5 bar,  $T_{\text{P}}$  = 105 °C,  $t_{\text{P}}$  = 3 h.

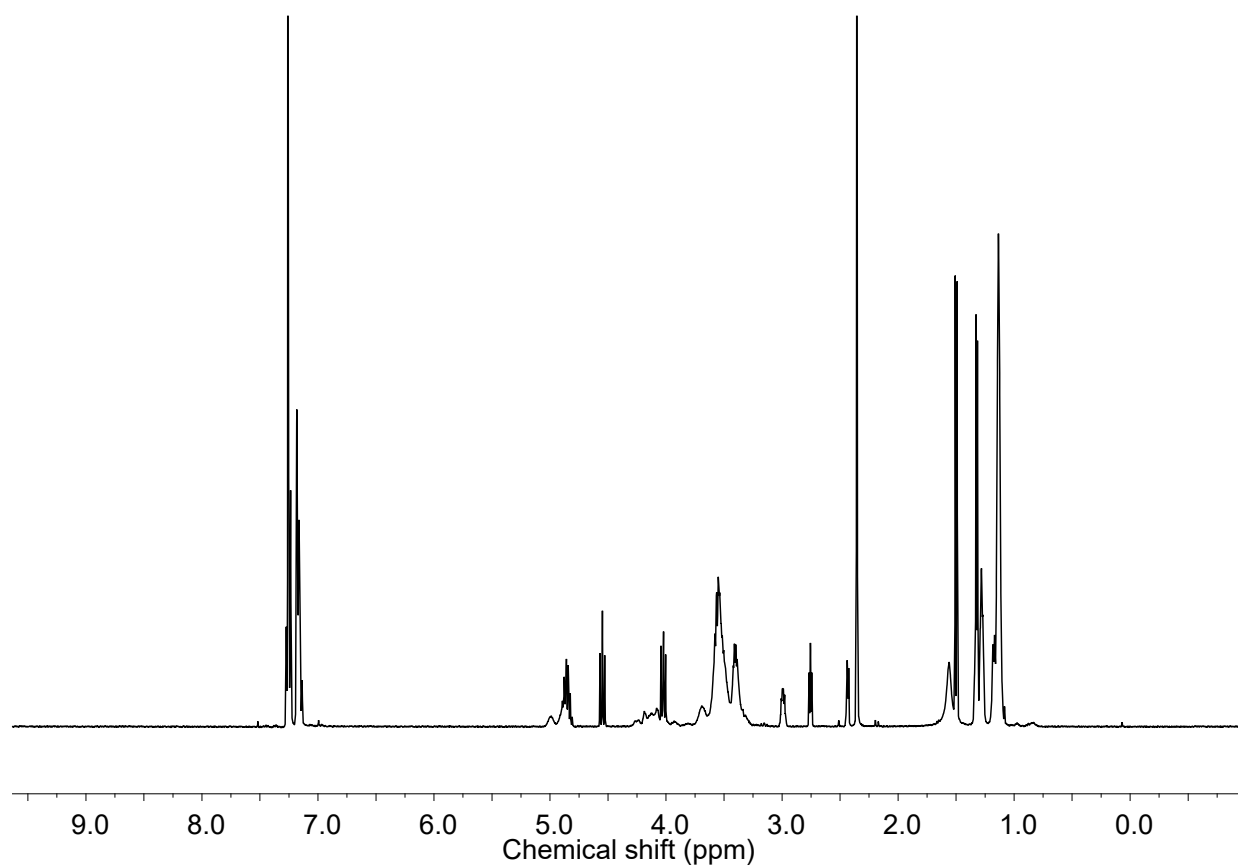

**Fig. S26**  $^1\text{H}$  NMR spectrum (400 MHz,  $\text{CDCl}_3$ ) of the crude reaction mixture of the ROP of PO and  $\text{CO}_2$  obtained by DMC-DEP. Polymerization Reaction condition: Catalyst amount = 50 mg , PO = 0.34 mol, PPG-600 = 2.5 mmol, toluene = 10 mL,  $P_{\text{CO}_2}$  = 10 bar,  $T_{\text{P}}$  = 105  $^\circ\text{C}$ ,  $t_{\text{P}}$  = 3 h.

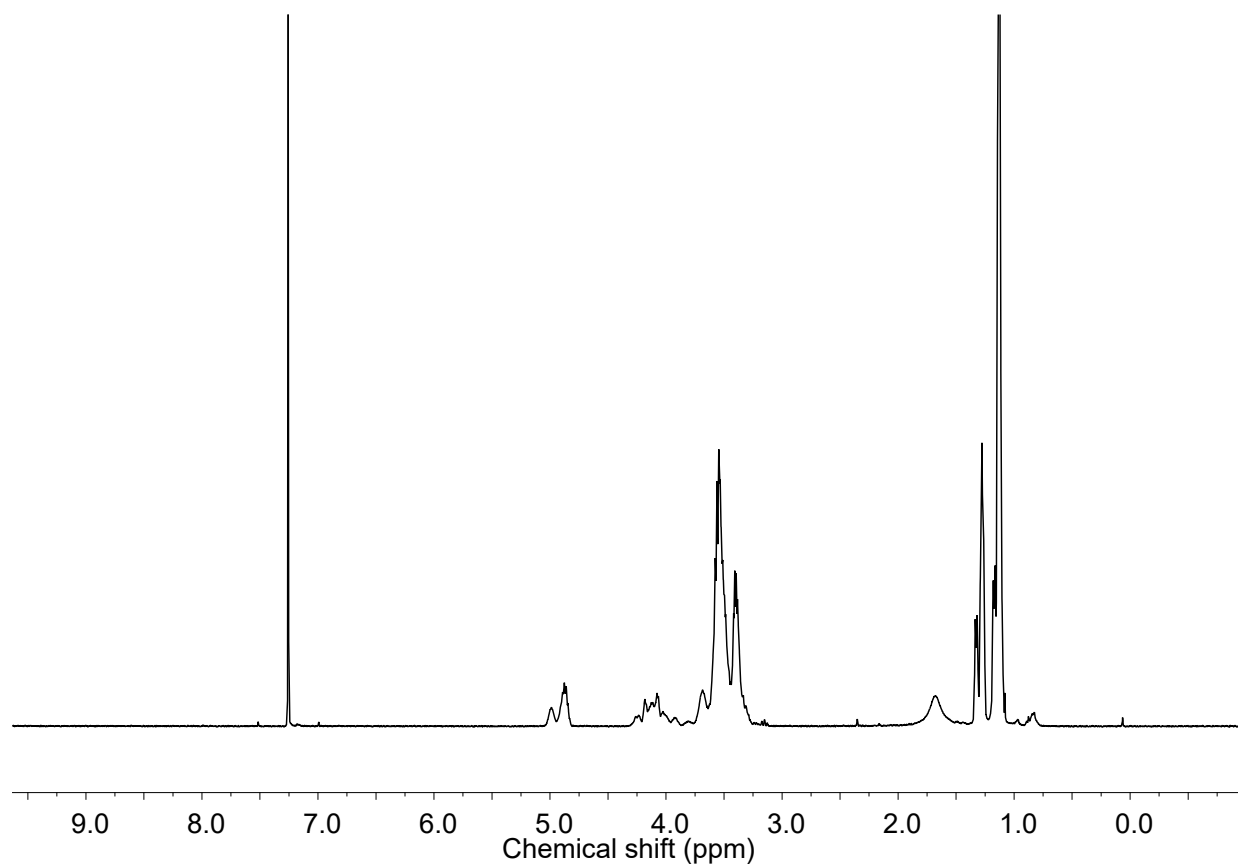

**Fig. S27**  $^1\text{H}$  NMR spectrum (400 MHz,  $\text{CDCl}_3$ ) of the polycarbonate polyol obtained by DMC-DEP. Polymerization Reaction condition: Catalyst amount = 50 mg , PO = 0.34 mol, PPG-600 = 2.5 mmol, toluene = 10 mL,  $P_{\text{CO}_2}$  = 10 bar,  $T_{\text{P}}$  = 105  $^{\circ}\text{C}$ ,  $t_{\text{P}}$  = 3 h.

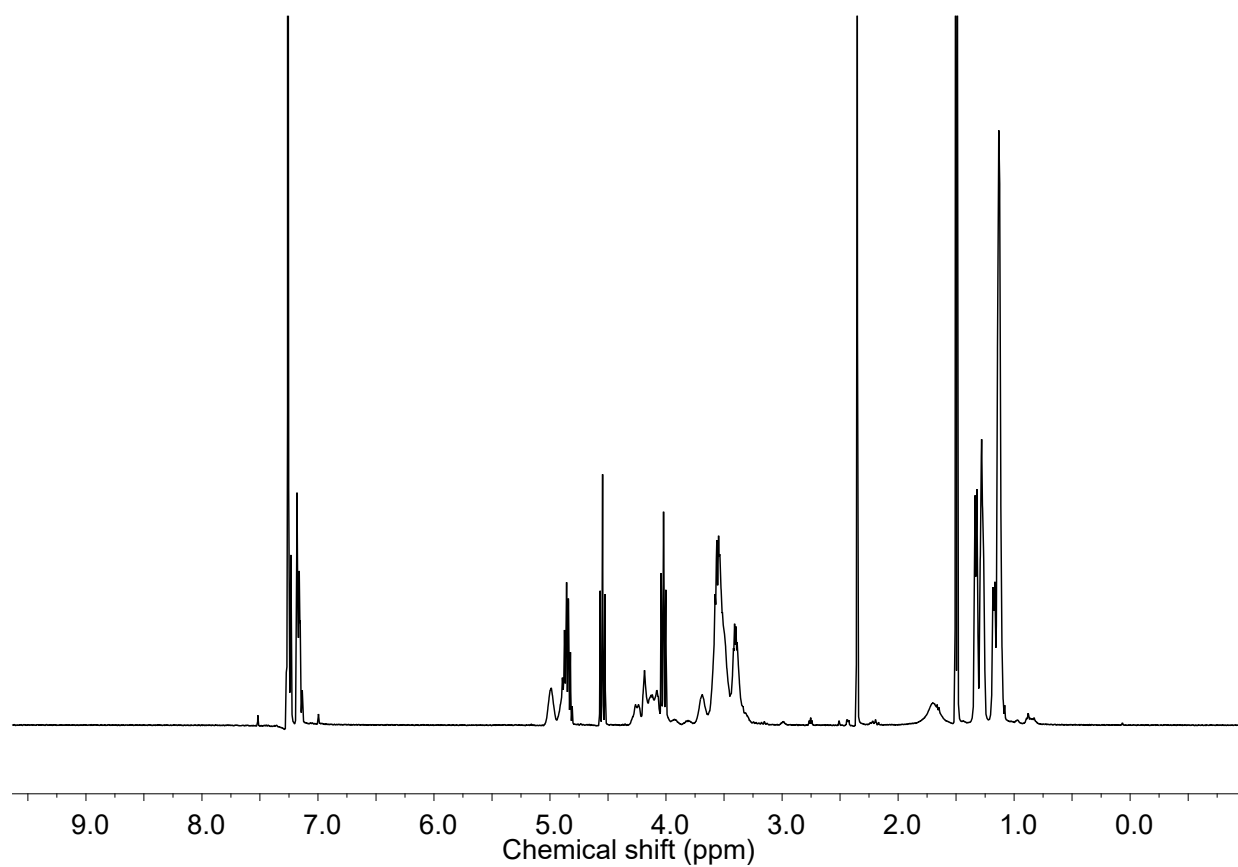

**Fig. S28**  $^1\text{H}$  NMR spectrum (400 MHz,  $\text{CDCl}_3$ ) of the crude reaction mixture of the ROP of PO and  $\text{CO}_2$  obtained by DMC-DEP. Polymerization Reaction condition: Catalyst amount = 50 mg , PO = 0.34 mol, PPG-600 = 2.5 mmol, toluene = 10 mL,  $P_{\text{CO}_2}$  = 20 bar,  $T_{\text{P}}$  = 105  $^{\circ}\text{C}$ ,  $t_{\text{P}}$  = 3 h.



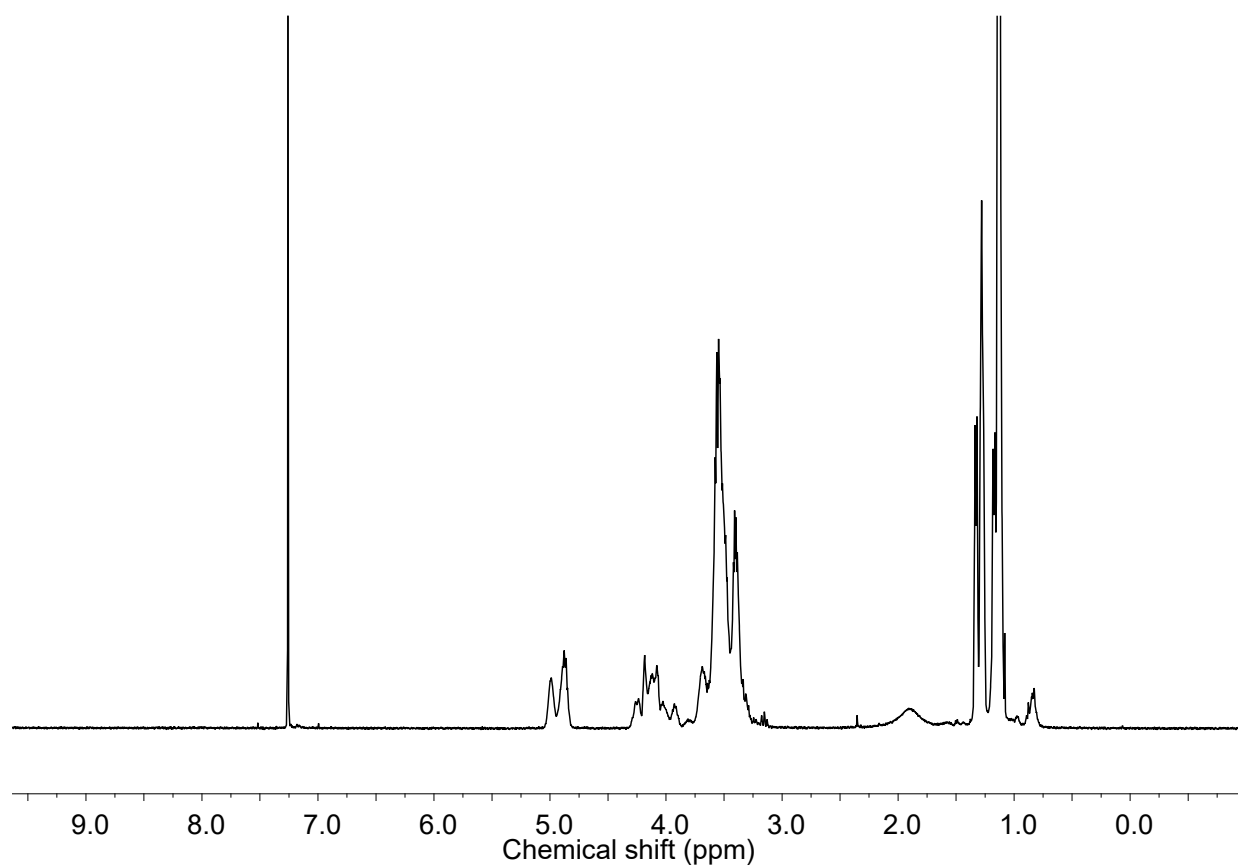

**Fig. S29**  $^1\text{H}$  NMR spectrum (400 MHz,  $\text{CDCl}_3$ ) of the polycarbonate polyol obtained by DMC-DEP. Polymerization Reaction condition: Catalyst amount = 50 mg , PO = 0.34 mol, PPG-600 = 2.5 mmol, toluene = 10 mL,  $P_{\text{CO}_2}$  = 20 bar,  $T_{\text{P}}$  = 105  $^{\circ}\text{C}$ ,  $t_{\text{P}}$  = 3 h.

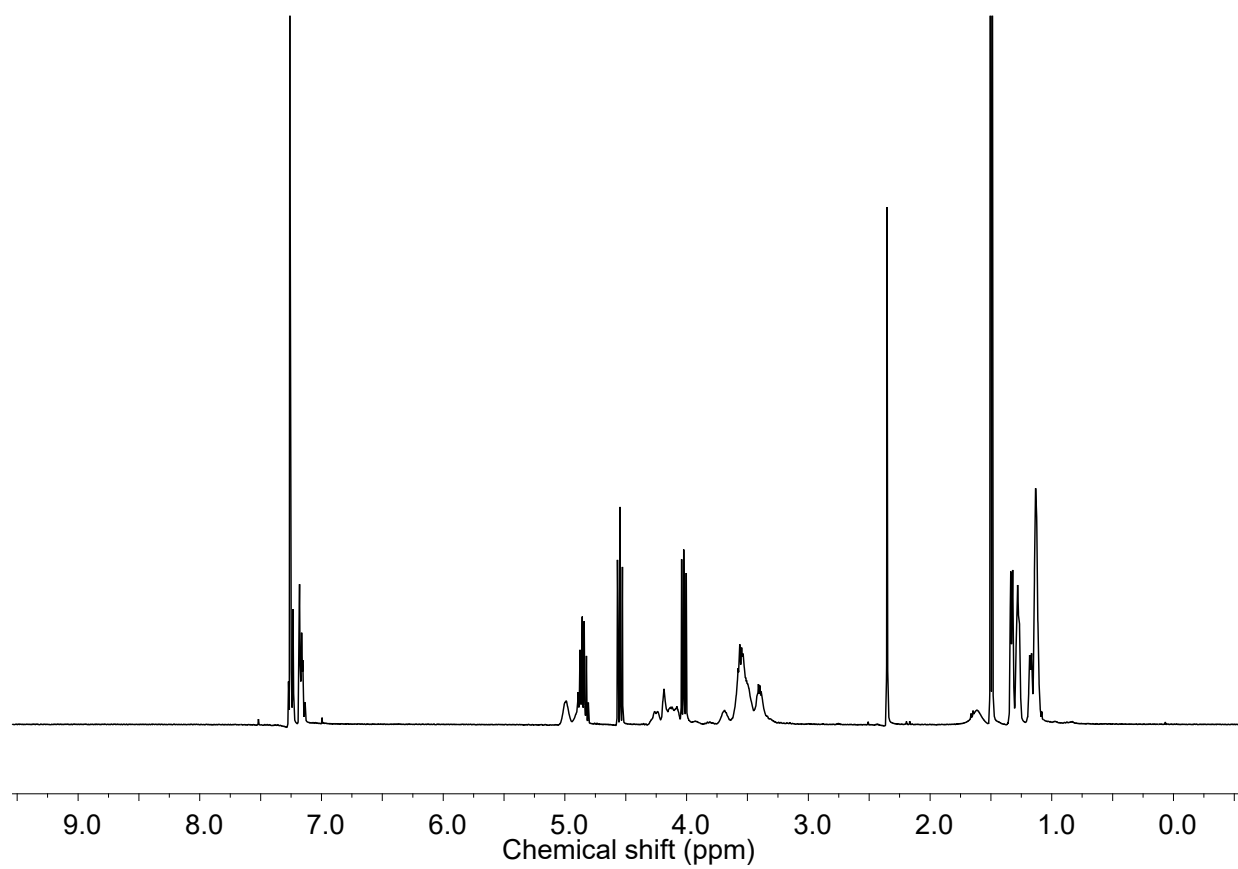

**Fig. S30**  $^1\text{H}$  NMR spectrum (400 MHz,  $\text{CDCl}_3$ ) of the crude reaction mixture of the ROP of PO and  $\text{CO}_2$  obtained by DMC-DEP. Polymerization Reaction condition: Catalyst amount = 50 mg , PO = 0.34 mol, PPG-600 = 0.25 mmol, toluene = 10 mL,  $P_{\text{CO}_2}$  = 30 bar,  $T_{\text{P}}$  = 105  $^\circ\text{C}$ ,  $t_{\text{P}}$  = 3 h.

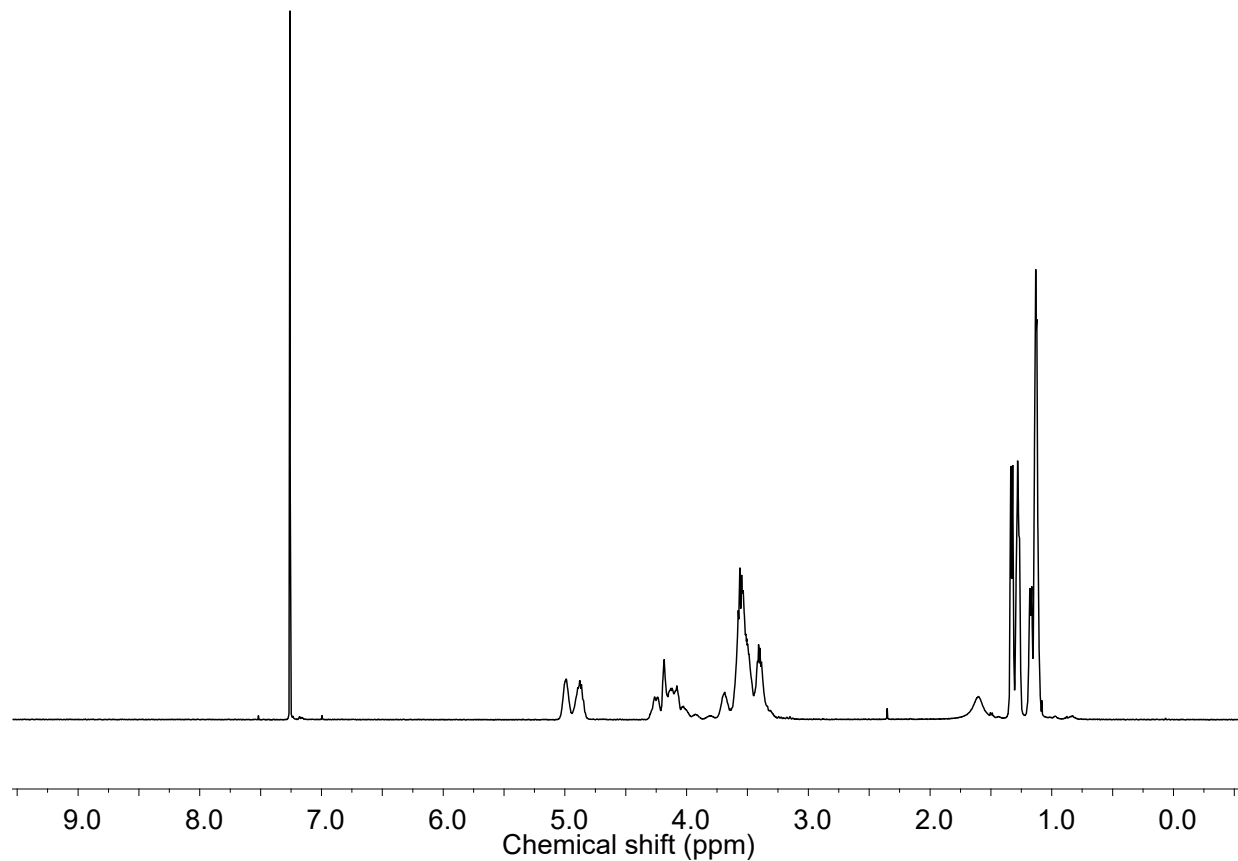

**Fig. S31**  $^1\text{H}$  NMR spectrum (400 MHz,  $\text{CDCl}_3$ ) of the polycarbonate polyol obtained by DMC-DEP. Polymerization Reaction condition: Catalyst amount = 50 mg , PO = 0.34 mol, PPG-600 = 0.25 mmol, toluene = 10 mL,  $P_{\text{CO}_2}$  = 30 bar,  $T_{\text{P}}$  = 105  $^\circ\text{C}$ ,  $t_{\text{P}}$  = 3 h.

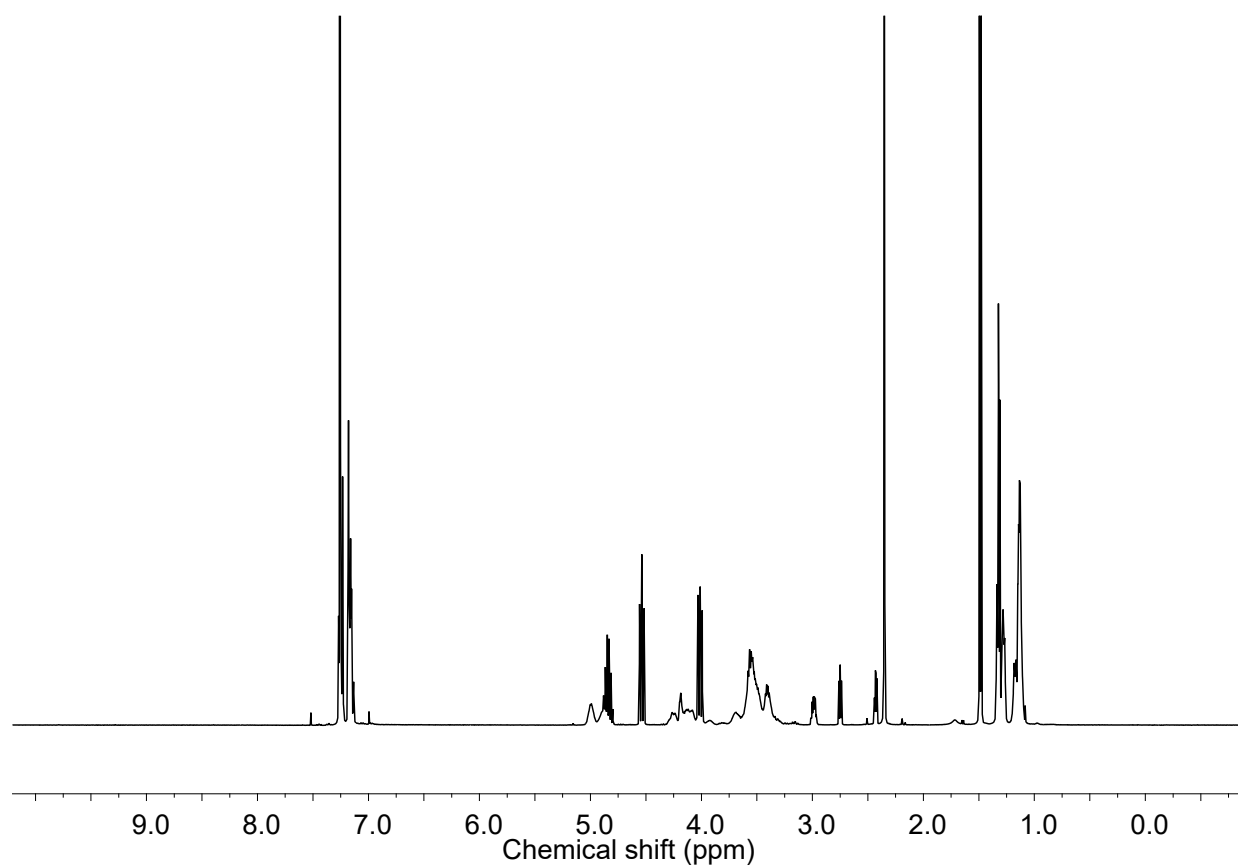

**Fig. S32**  $^1\text{H}$  NMR spectrum (400 MHz,  $\text{CDCl}_3$ ) of the crude reaction mixture of the ROP of PO and  $\text{CO}_2$  obtained by DMC-DEP. Polymerization Reaction condition: Catalyst amount = 50 mg , PO = 0.34 mol, PPG-600 = 2.5 mmol, toluene = 10 mL,  $P_{\text{CO}_2}$  = 30 bar,  $T_{\text{P}}$  = 105  $^\circ\text{C}$ ,  $t_{\text{P}}$  = 3 h.

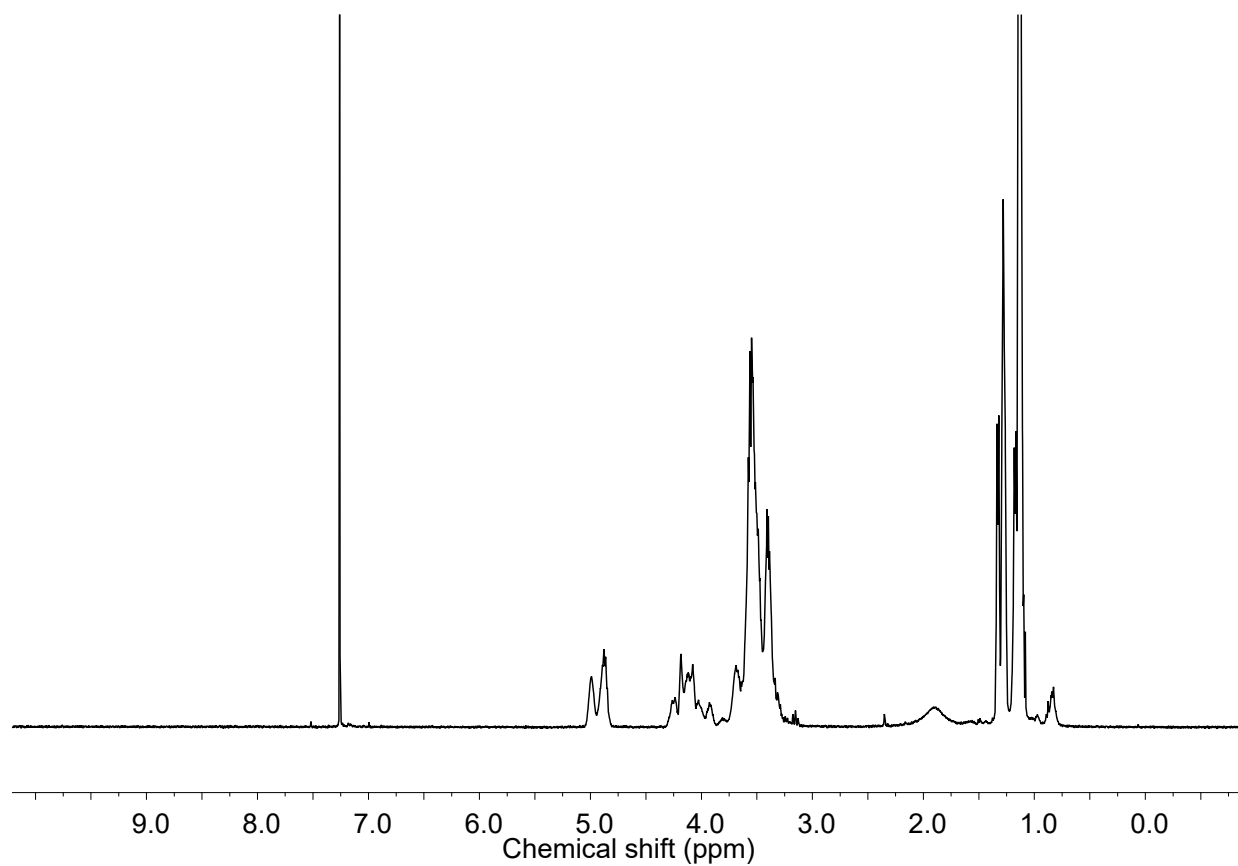

**Fig. S33**  $^1\text{H}$  NMR spectrum (400 MHz,  $\text{CDCl}_3$ ) of the polycarbonate polyol obtained by DMC-DEP. Polymerization Reaction condition: Catalyst amount = 50 mg, PO = 0.34 mol, PPG-600 = 2.5 mmol, toluene = 10 mL,  $P_{\text{CO}_2}$  = 30 bar,  $T_{\text{P}}$  = 105  $^{\circ}\text{C}$ ,  $t_{\text{P}}$  = 3 h.

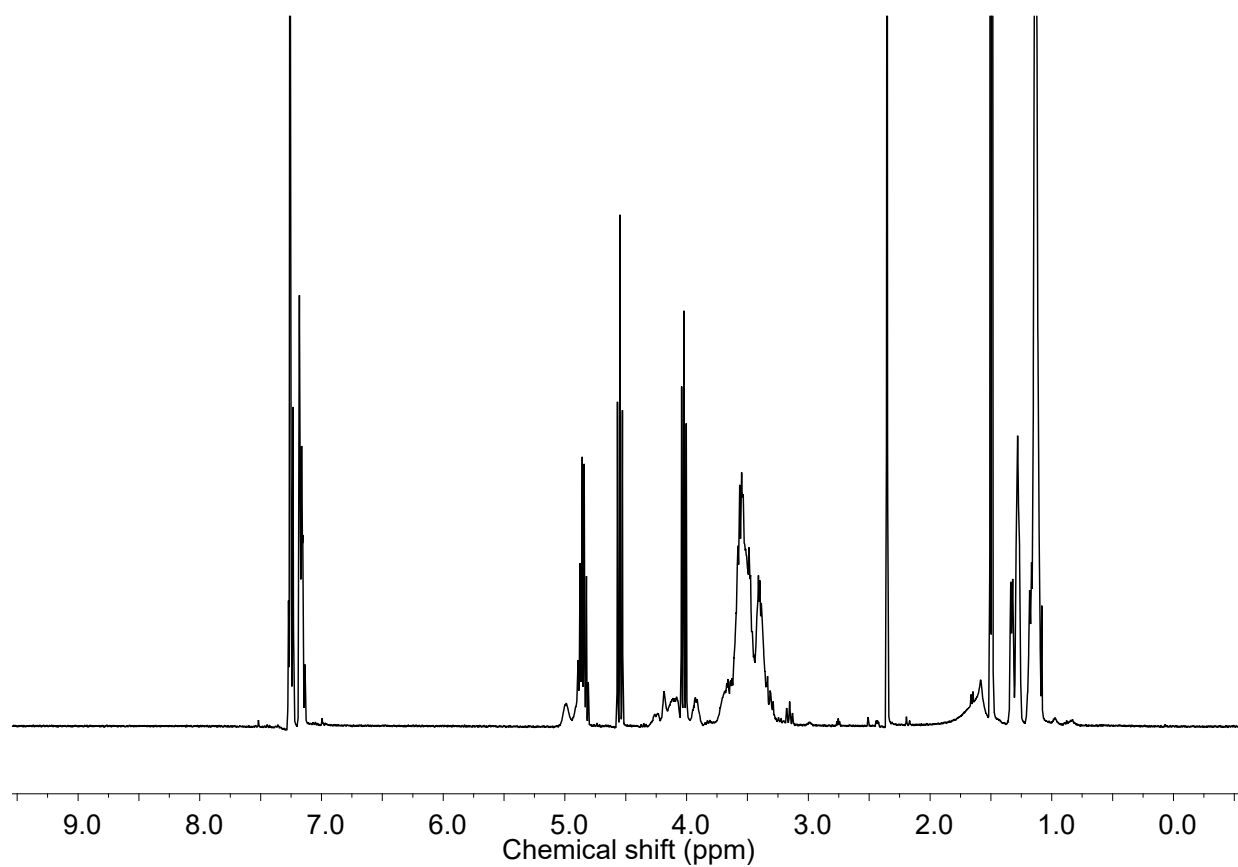

**Fig. S34**  $^1\text{H}$  NMR spectrum (400 MHz,  $\text{CDCl}_3$ ) of the crude reaction mixture of the ROP of PO and  $\text{CO}_2$  obtained by DMC-DEP. Polymerization Reaction condition: Catalyst amount = 50 mg , PO = 0.34 mol, PPG-600 = 12.5 mmol, toluene = 10 mL,  $P_{\text{CO}_2}$  = 30 bar,  $T_{\text{P}}$  = 105  $^\circ\text{C}$ ,  $t_{\text{P}}$  = 3 h.

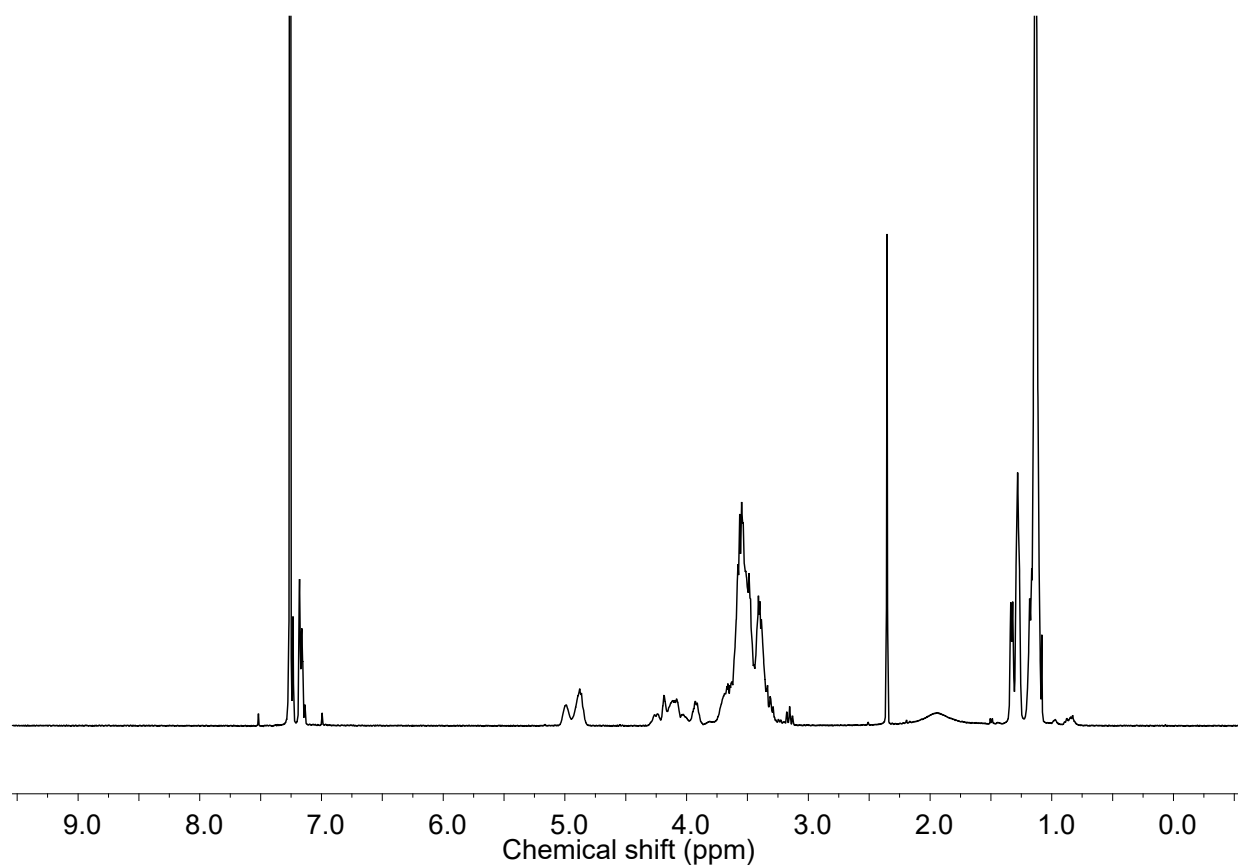

**Fig. S35**  $^1\text{H}$  NMR spectrum (400 MHz,  $\text{CDCl}_3$ ) of the polycarbonate polyol obtained by DMC-DEP. Polymerization Reaction condition: : Catalyst amount = 50 mg , PO = 0.34 mol, PPG-600 = 12.5 mmol, toluene = 10 mL,  $P_{\text{CO}_2}$  = 30 bar,  $T_{\text{P}}$  = 105  $^\circ\text{C}$ ,  $t_{\text{P}}$  = 3 h.

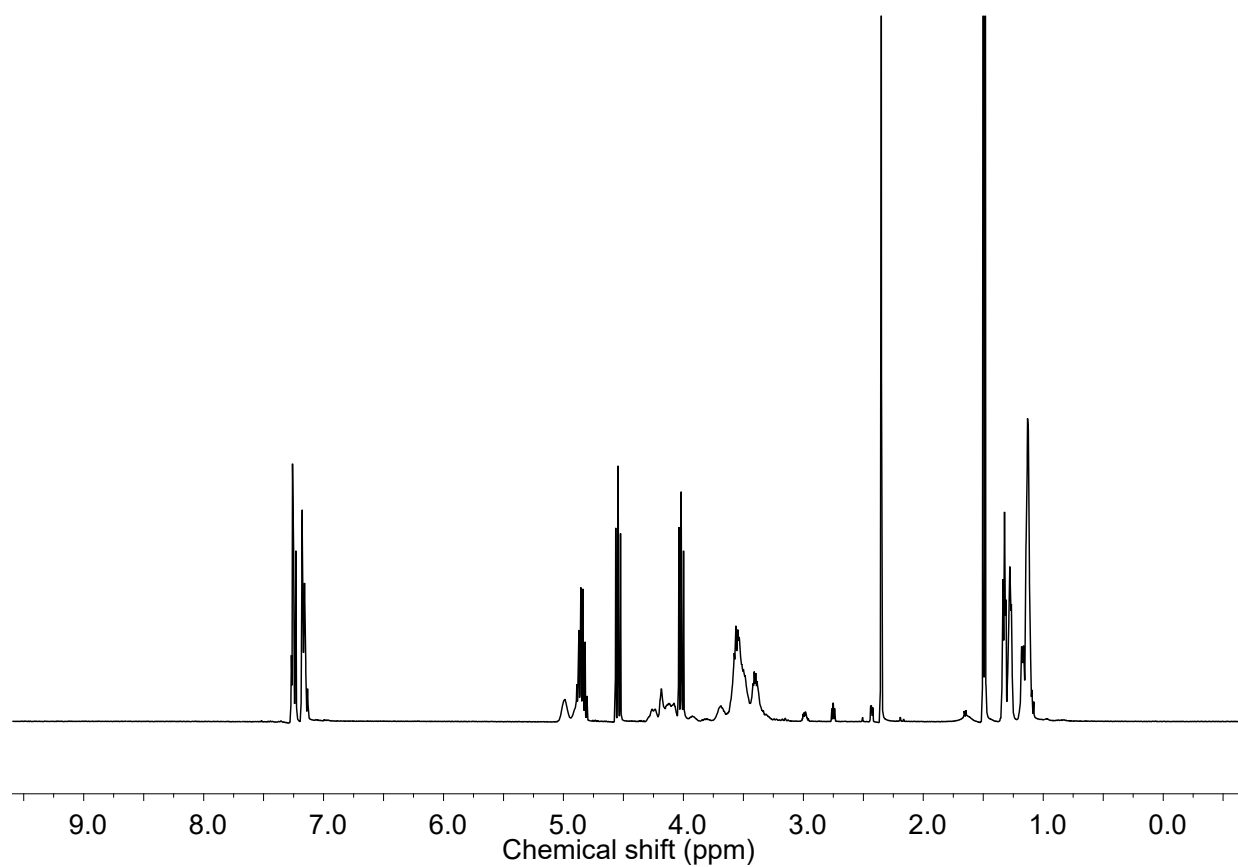

**Fig. S36**  $^1\text{H}$  NMR spectrum (400 MHz,  $\text{CDCl}_3$ ) of the crude reaction mixture of the ROP of PO and  $\text{CO}_2$  obtained by DMC- $\text{P}(\text{OEt})_3$ . Polymerization Reaction condition: Catalyst amount = 50 mg, PO = 0.34 mol, PPG-600 = 2.5 mmol, toluene = 10 mL,  $P_{\text{CO}_2}$  = 30 bar,  $T_{\text{P}}$  = 105  $^\circ\text{C}$ ,  $t_{\text{P}}$  = 3 h.



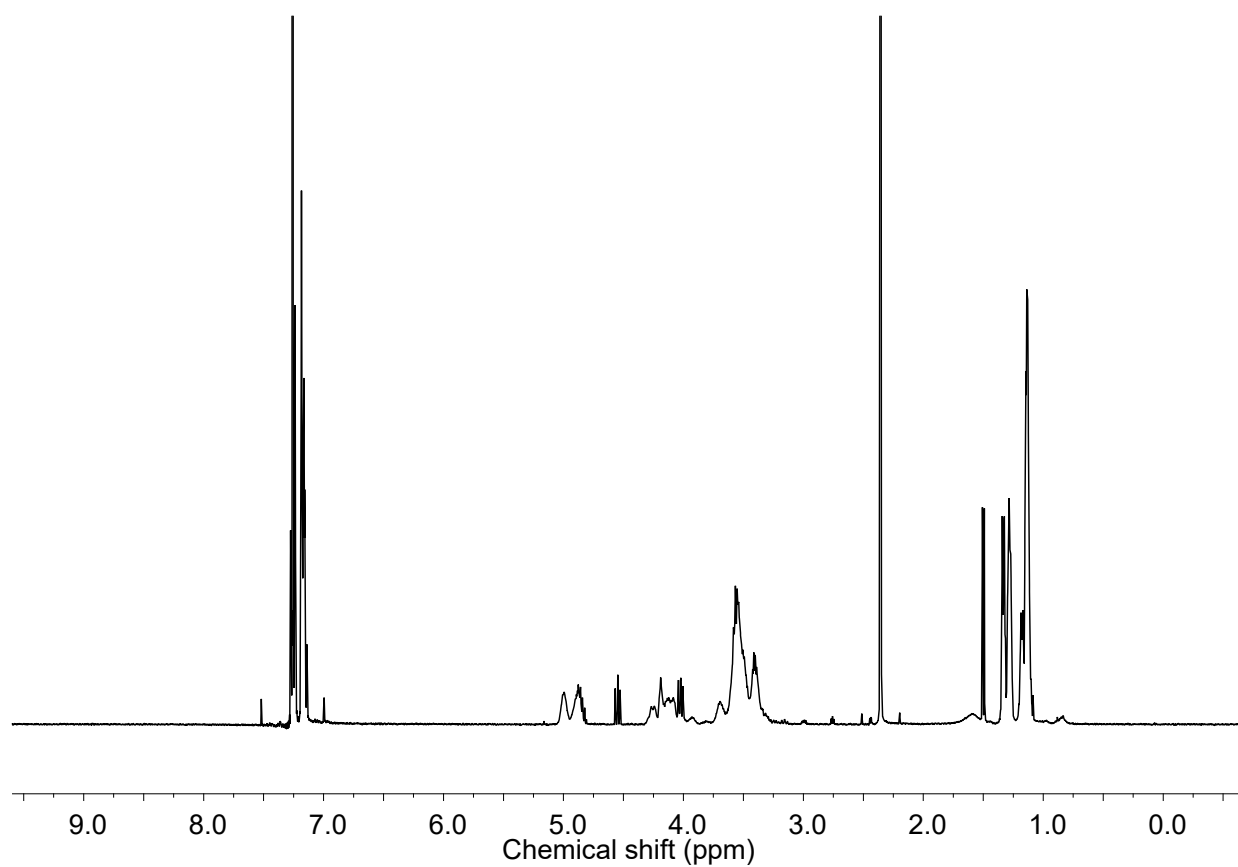

**Fig. S37**  $^1\text{H}$  NMR spectrum (400 MHz,  $\text{CDCl}_3$ ) of the polycarbonate polyol obtained by DMC- $\text{P}(\text{OEt})_3$ . Polymerization Reaction condition: : Catalyst amount = 50 mg , PO = 0.34 mol, PPG-600 = 2.5 mmol, toluene = 10 mL,  $P_{\text{CO}_2}$  = 30 bar,  $T_{\text{P}}$  = 105  $^\circ\text{C}$ ,  $t_{\text{P}}$  = 3 h.

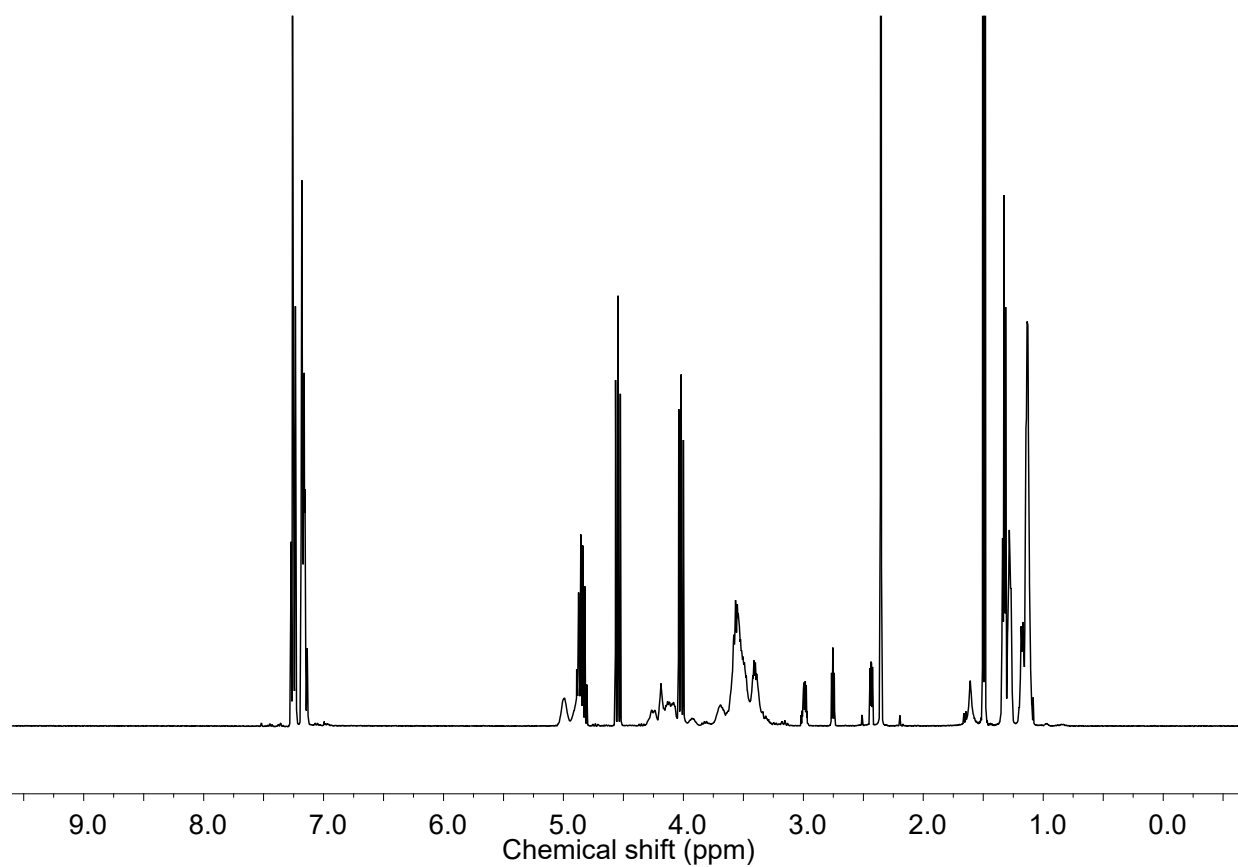

**Fig. S38**  $^1\text{H}$  NMR spectrum (400 MHz,  $\text{CDCl}_3$ ) of the crude reaction mixture of the ROP of PO and  $\text{CO}_2$  obtained by DMC-TEP. Polymerization Reaction condition: : Catalyst amount = 50 mg, PO = 0.34 mol, PPG-600 = 2.5 mmol, toluene = 10 mL,  $P_{\text{CO}_2}$  = 30 bar,  $T_{\text{P}}$  = 105  $^\circ\text{C}$ ,  $t_{\text{P}}$  = 3 h

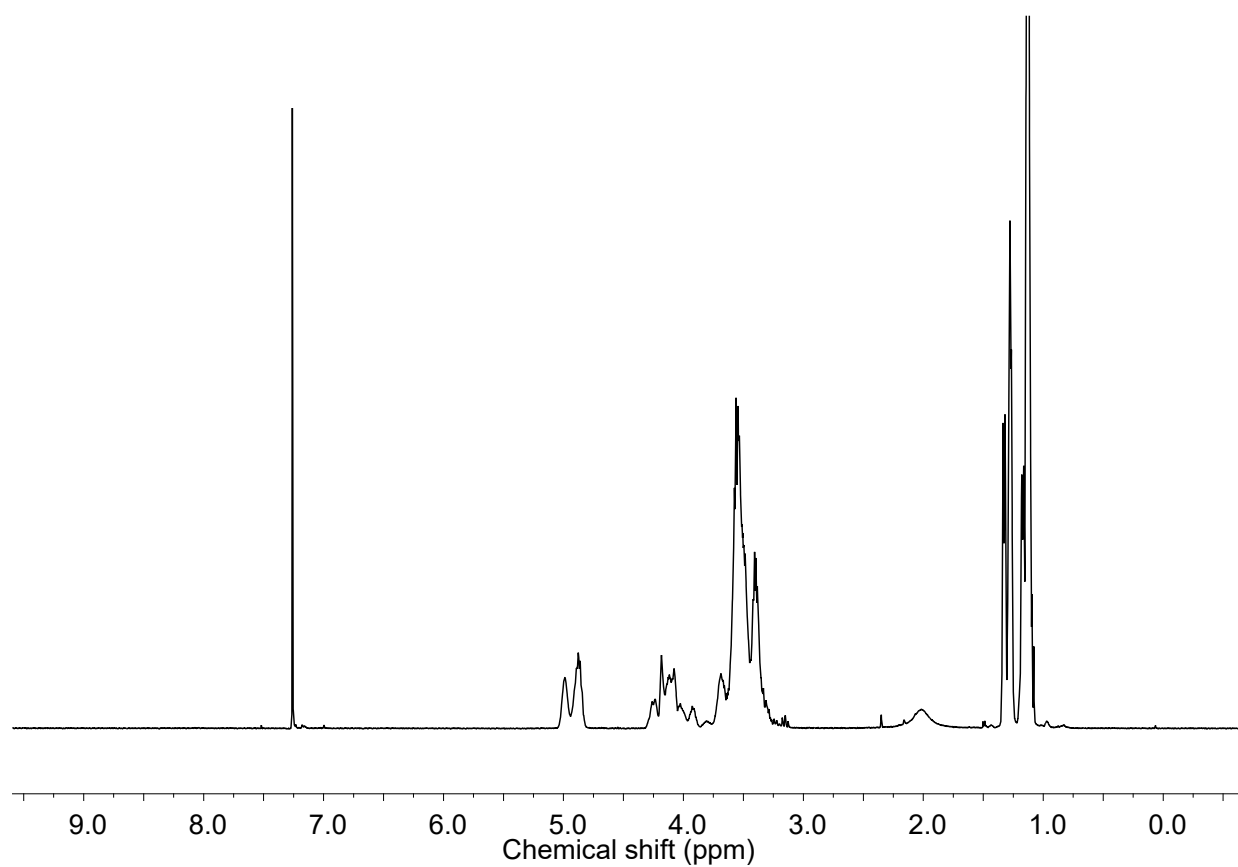

**Fig. S39**  $^1\text{H}$  NMR spectrum (400 MHz,  $\text{CDCl}_3$ ) of the polycarbonate polyol obtained by DMC-TEP. Polymerization Reaction condition: : Catalyst amount = 50 mg , PO = 0.34 mol, PPG-600 = 2.5 mmol, toluene = 10 mL,  $P_{\text{CO}_2}$  = 30 bar,  $T_{\text{P}}$  = 105  $^{\circ}\text{C}$ ,  $t_{\text{P}}$  = 3 h.

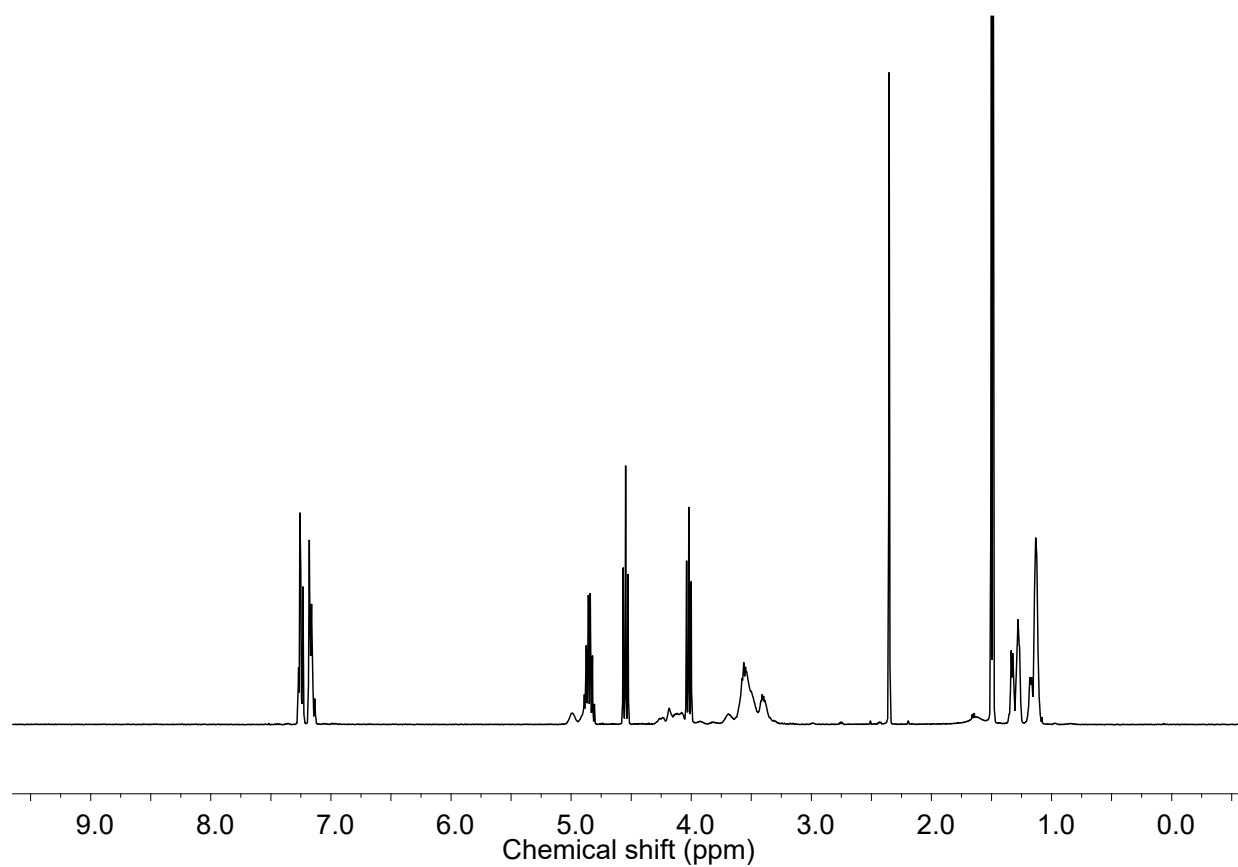

**Fig. S40**  $^1\text{H}$  NMR spectrum (400 MHz,  $\text{CDCl}_3$ ) of the crude reaction mixture of the ROP of PO and  $\text{CO}_2$  obtained by DMC-TEP without co-CA. Polymerization Reaction condition: : Catalyst amount = 50 mg , PO = 0.34 mol, PPG-600 = 2.5 mmol, toluene = 10 mL,  $P_{\text{CO}_2}$  = 30 bar,  $T_{\text{P}}$  = 105  $^{\circ}\text{C}$ ,  $t_{\text{P}}$  = 3 h

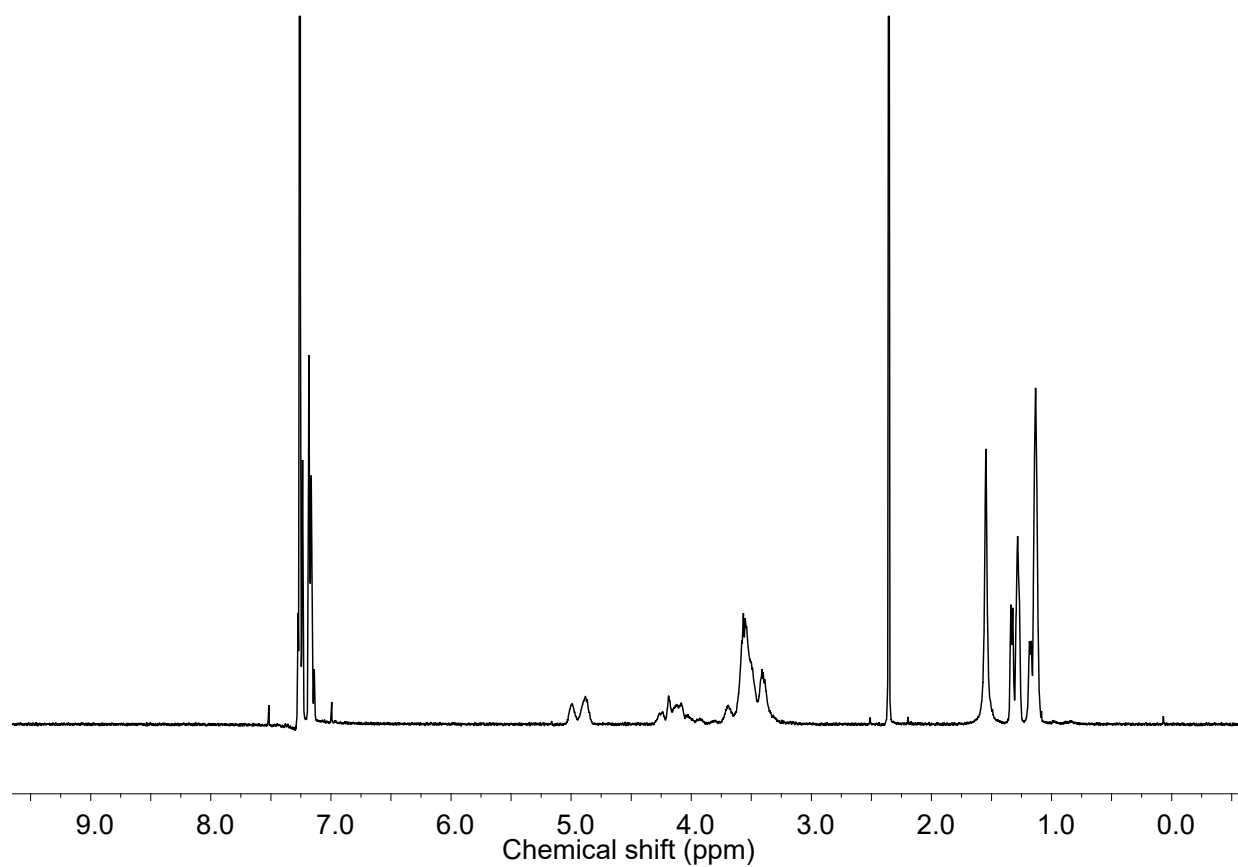

**Fig. S41**  $^1\text{H}$  NMR spectrum (400 MHz,  $\text{CDCl}_3$ ) of the polycarbonate polyol obtained by DMC-TEP without co-CA. Polymerization Reaction condition: Catalyst amount = 50 mg , PO = 0.34 mol, PPG-600 = 2.5 mmol, toluene = 10 mL,  $P_{\text{CO}_2}$  = 30 bar,  $T_{\text{P}}$  = 105  $^\circ\text{C}$ ,  $t_{\text{P}}$  = 3 h.

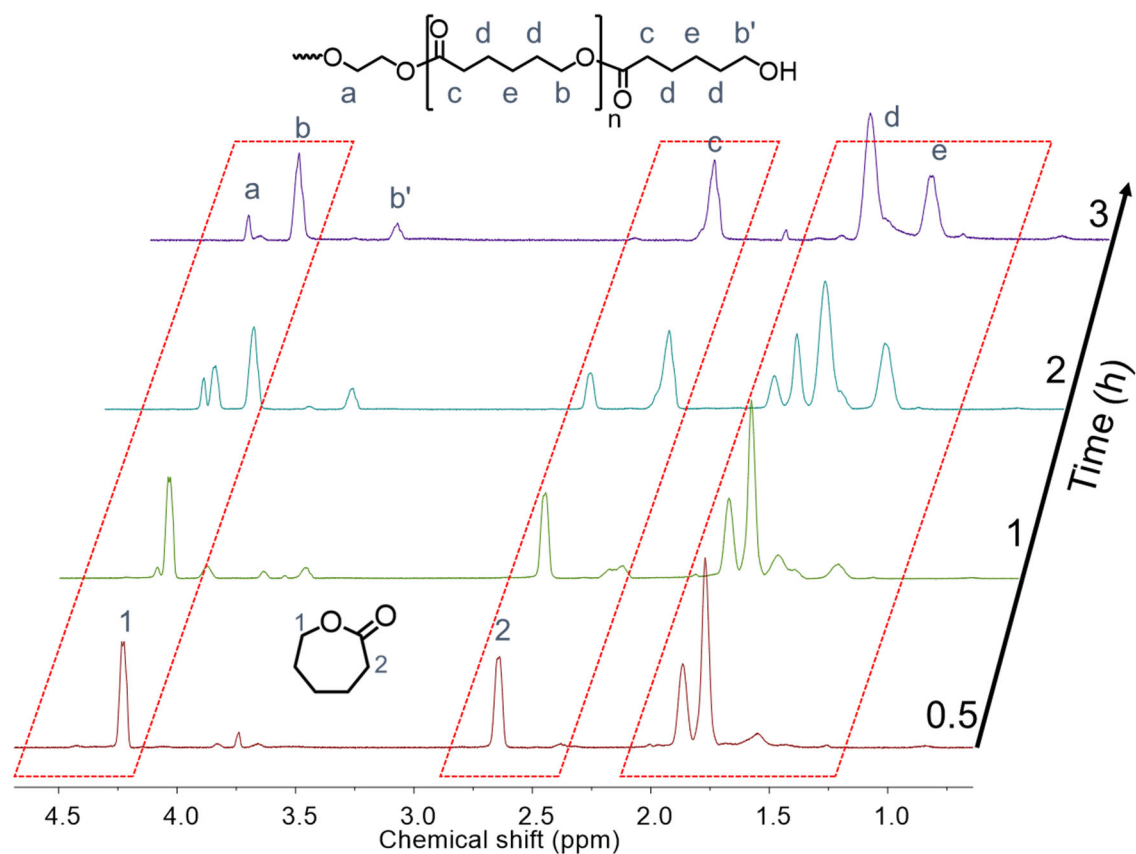

**Fig. S42**  $^1\text{H}$  NMR spectra (400 MHz,  $\text{CDCl}_3$ ) of the crude reaction mixture of CL: polymerization using EG initiator and DMC-DEP catalyst. Reaction Conditions: catalyst amount = 10 mg ( $[\text{Zn}]_0 = 30 \text{ mM}$ ),  $[\text{CL}]_0 = 9 \text{ M}$ ,  $[\text{CL}]_0/[\text{EG}]_0 = 10$ ,  $T_p = 160^\circ\text{C}$ .

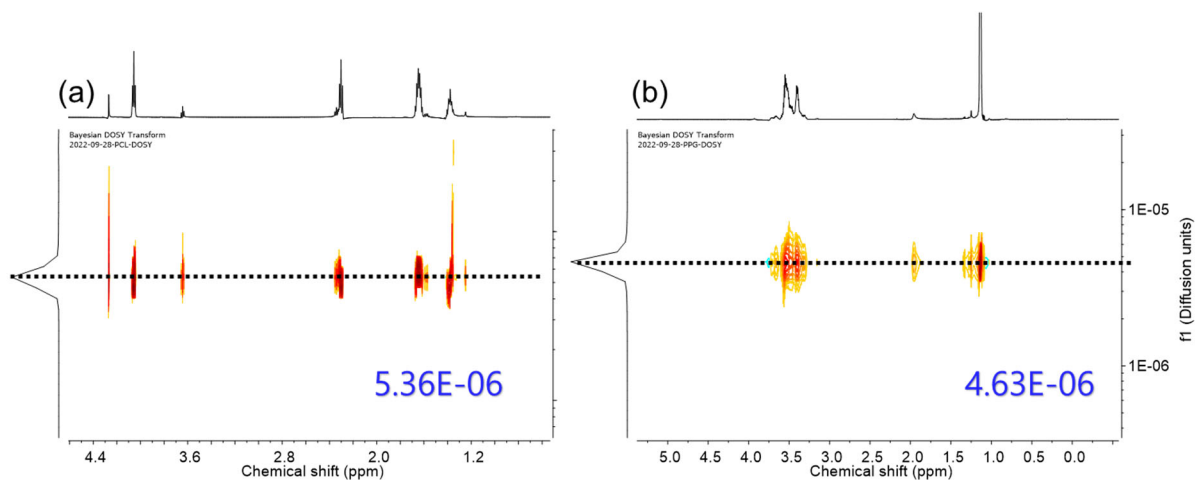

**Fig. S43** 2D DOSY NMR Spectra (600 MHz,  $\text{CDCl}_3$ ) of (a) PCL 2000 and (b) PPG. Reaction condition: Catalyst amount = 50 mg,  $T_p = 115^\circ\text{C}$ .

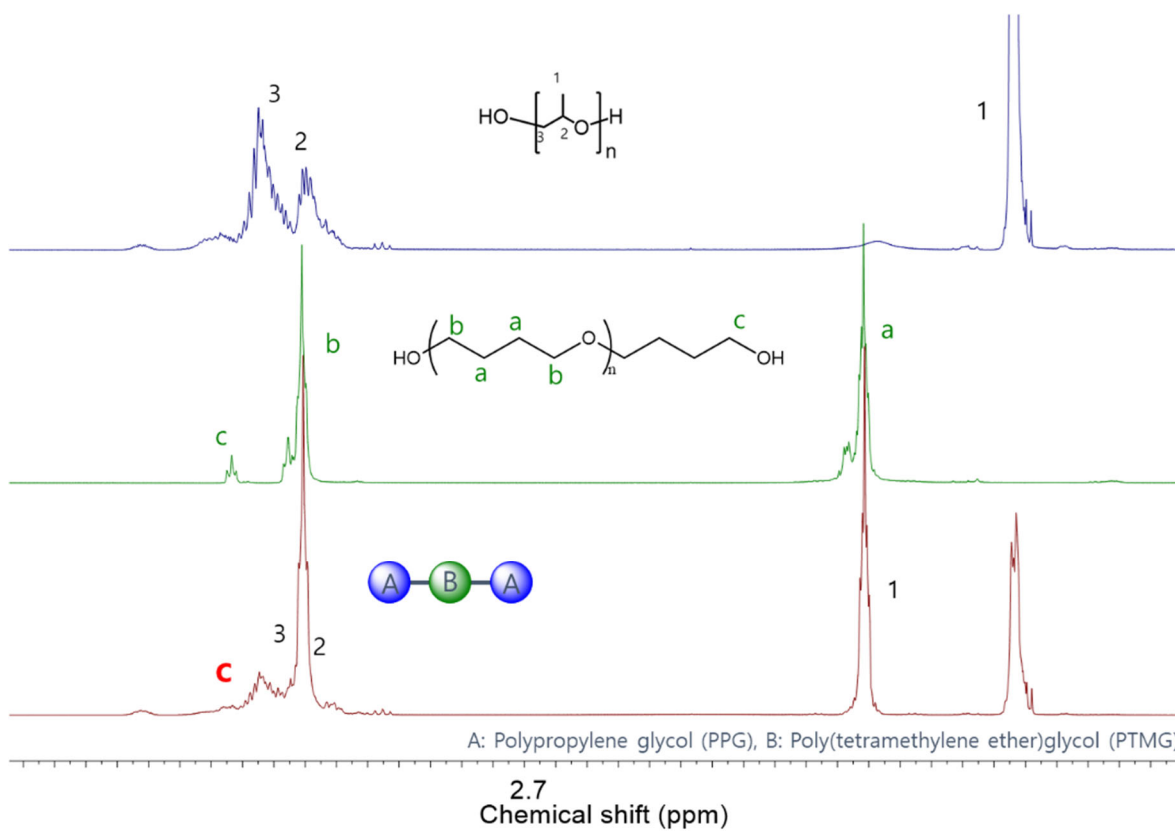

**Fig. S44**  $^1\text{H}$ -NMR spectra of PPG, PTMG and PPG-PTMG block copolymer (BCP-5).

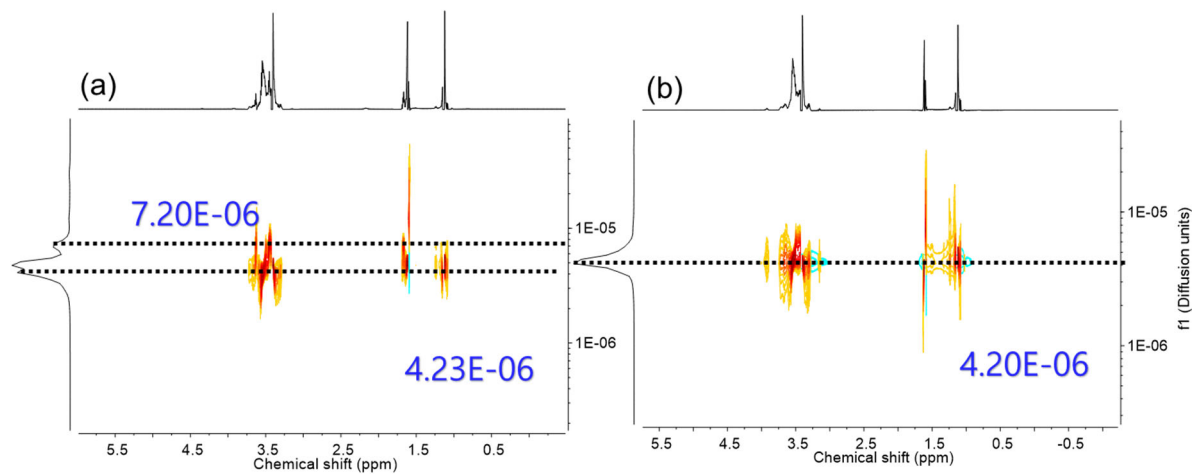

**Fig. S45** 2D DOSY NMR Spectra (600 MHz,  $\text{CDCl}_3$ ) of (a) PPG and PTMG mixture and (b) BCP-5.

Reaction condition: Catalyst amount = 50 mg,  $T_P$  = 115 °C.

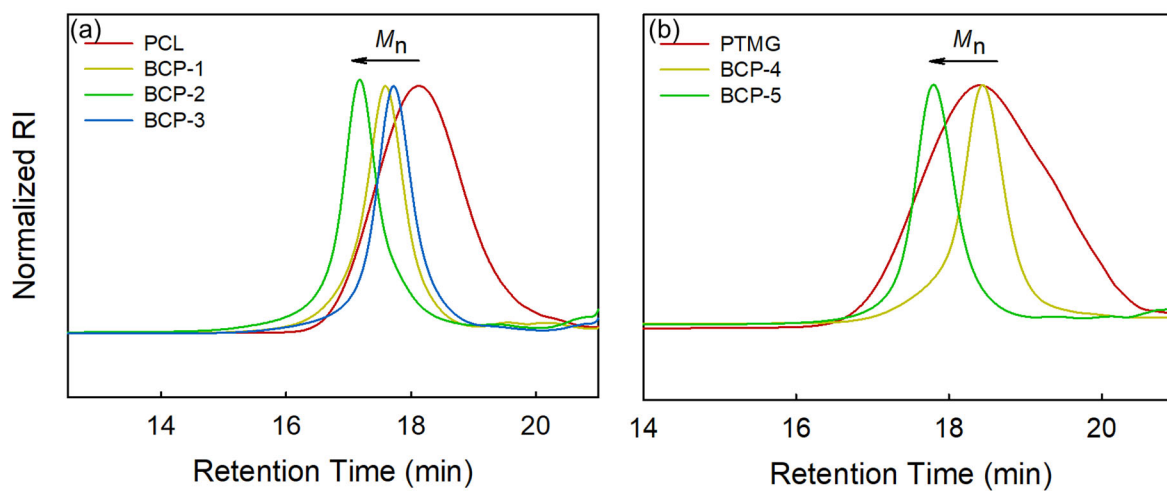

**Fig. S46** GPC curves of the block copolymer obtained by batch ROP initiated by (a) PCL and (b) PTMG.



## 2. Supplementary tables

**Table S1.** DMC catalysts prepared using ZnCl<sub>2</sub>(15 mmol), K<sub>3</sub>Co(CN)<sub>6</sub> (1.5 mmol), and various type of OPC CAs.

| Catalyst                           | Complexing agents                    |                                  |                |                   |              |               | Solubility in water<br>(g/100 mL in 25 °C) |
|------------------------------------|--------------------------------------|----------------------------------|----------------|-------------------|--------------|---------------|--------------------------------------------|
|                                    | Type / Amount <sup>a</sup><br>(mmol) | Temperature <sup>b</sup><br>(°C) | M.W<br>(g/mol) | Density<br>(g/mL) | b.p.<br>(°C) | Acidity (pKa) |                                            |
| DMC-DMP                            | DMP/36                               | 70                               | 110            | 1.2               | 171          | 18.4          |                                            |
| DMC-DEP                            | DEP/26                               | 30                               | 138.1          | 1.072             | 188          | 13.0          | miscible                                   |
| DMC-DtBuP                          | DtBuP/16                             | 70                               | 193.2          | 0.960             | 225          |               |                                            |
| DMC-DMMP                           | DMMP/30                              |                                  | 124.1          | 1.145             | 181          | 2.37          | miscible                                   |
| DMC- P(OMe) <sub>3</sub>           | P(OMe) <sub>3</sub> /28              | 70                               | 124.1          | 1.052             | 111          |               | immiscible                                 |
| DMC- P(OEt) <sub>3</sub>           | P(OEt) <sub>3</sub> /19              | 70                               | 166.2          | 0.969             | 156          |               | immiscible                                 |
| DMC-TMP                            | TMP/28                               | 70                               | 140.1          | 1.197             | 197          |               | 50                                         |
| DMC-TEP                            | TEP/35                               | 70                               | 182.2          | 1.072             | 215          | -9.1          | miscible                                   |
| DMC-TIP                            | TIP/26                               | 70                               | 224.2          | 0.970             | 224          |               | immiscible                                 |
| DMC-H <sub>3</sub> PO <sub>3</sub> | H <sub>3</sub> PO <sub>3</sub> /66   | -                                | 82.0           | 1.65              | 100          | 2.1/7.2/12.7  | 310                                        |

<sup>a</sup> Optimized amount through screening tests. <sup>b</sup> Catalysts and their optimized preparation temperature.

**Table S2** Properties of triblock copolymers as co-complexing agent.

| Type                                                           | PEG -PPG- PEG |        |        |        | PPG-PEG-PPG |        |
|----------------------------------------------------------------|---------------|--------|--------|--------|-------------|--------|
| Trade name (Pluronic), BASF                                    | F-108         | P-123  | L-121  | L-35   | L-31        | 31R1   |
| $M_n$                                                          | ~14,600       | ~5,800 | ~4,400 | ~1,900 | ~1,100      | ~3,300 |
| PEG (wt%)                                                      | 82.5          | 30     | 30     | 50     | 10          | 10     |
| PO units                                                       | 50            | 69     | 67     | 16     | 16          | 2x26   |
| EO units                                                       | 2x132         | 2x19   | 2x13   | 2x11   | 2x2         | 8      |
| Surface tension (dyn/cm); 25 °C, 0.1 wt. % in H <sub>2</sub> O | 41            | 34     | 33     | 49     | 47          | 34     |
| Brookfield Viscosity (cP) at 25 °C                             | 2,800         | 350    | 1,200  | 375    | 175         | 660    |
| Cloud point (°C) at 1 wt. % aqueous solution                   | >100          | 90     | 14     | 73     | 37          | 25     |
| $T_m$ (°C)                                                     | 60            | 39     |        |        |             |        |
| Softening point (°C)                                           |               |        | 5      | 7      | −32         | −25    |
| Density (g/mL) at 25 °C                                        |               | 1.018  | 1.006  | 1.06   | 1.018       | 1.018  |
| Hydrophilic-lipophilic balance (HLB)                           | 27            | 8      | 1      | 19     | 5           | 1      |
| pH (2.5% in H <sub>2</sub> O)                                  | 6.0-7.4       |        |        |        |             |        |
| refractive index n <sub>20/D</sub>                             |               | 1.465  | 1.454  | 1.461  | 1.453       | 1.454  |
| Critical micelle concentration (%wt/v)                         | 30 °C         | 0.8    | 0.005  |        |             |        |
|                                                                | 45 °C         | 0.008  |        |        |             |        |

<sup>a</sup> Boiling point.

**Table S3** Summary of the FTIR results of DMC catalysts prepared by different OPC CAs

| Catalyst                           | Vibration frequency (cm <sup>-1</sup> ) |                               |                        |                   |                     |                   | $\delta(\text{Co-CN})$ |
|------------------------------------|-----------------------------------------|-------------------------------|------------------------|-------------------|---------------------|-------------------|------------------------|
|                                    | $\nu(\text{OH})$                        | $\nu(\text{C}\equiv\text{N})$ | $\delta(\text{H-O-H})$ | $\nu(\text{P=O})$ | $\nu(\text{C-O-C})$ | $\nu(\text{P-O})$ |                        |
| DMC-pure                           | 3650;<br>3424                           | 2177                          | 1612                   | —                 | —                   | —                 | 450                    |
| DMC-tBuOH                          | 3439                                    | 2194                          | 1625                   | —                 | 1086                | —                 | 474                    |
| DMC-DMP                            | 3649;<br>3416                           | 2192                          | 1618                   | 1198              | 1083                | 792               | 472                    |
| DMC-DEP                            | 3414                                    | 2192                          | 1616                   | 1237              | 1069                | 788               | 468                    |
| DMC-DtBuP                          | 3444                                    | 2199                          | 1617                   | 1259              | 1086                |                   | 475                    |
| DMC-DMMP                           | 3414                                    | 2189                          | 1618                   | 1233              | 1071                | 796               | 468                    |
| DMC-P(OMe) <sub>3</sub>            | 3419                                    | 2193                          | 1619                   | 1258              | 1077                | 862               | 473                    |
| DMC- P(OEt) <sub>3</sub>           | 3411                                    | 2197                          | 1619                   | 1231              | 1070                | 789               | 474                    |
| DMC-TMP                            | 3416                                    | 2191                          | 1620                   | 1222              | 1059                | 850               | 473                    |
| DMC-TEP                            | 3419                                    | 2189                          | 1620                   | 1249              | 1074                | 800               | 471                    |
| DMC-TIP                            | 3411                                    | 2186                          | 1617                   | 1221              | 1042                | 785               | 468                    |
| DMC-H <sub>3</sub> PO <sub>3</sub> |                                         |                               |                        |                   |                     |                   |                        |

**Table S4** Summary of the FTIR results of optimized DMC catalysts prepared by different temperature

| Catalyst <sup>a</sup>              | T(°C) | Vibration frequency (cm <sup>-1</sup> ) |                          |                          |                               |
|------------------------------------|-------|-----------------------------------------|--------------------------|--------------------------|-------------------------------|
|                                    |       | $\nu(\text{C}\equiv\text{N})$           | $\nu(\text{P}=\text{O})$ | $\nu(\text{P}-\text{O})$ | $\delta(\text{Co}-\text{CN})$ |
| DEP                                | –     | –                                       | 1254                     | 770                      | –                             |
| DMC-DEP                            | 30    | 2192                                    | 1237                     | 788                      | 468                           |
|                                    | 50    |                                         | 1220                     |                          | 471                           |
|                                    | 70    |                                         | 1213                     |                          | 474                           |
|                                    | 90    |                                         | 1232                     |                          | 474                           |
| DMC-H <sub>3</sub> PO <sub>3</sub> | 30    | 2181                                    |                          | 792                      | 452                           |
| P(OEt) <sub>3</sub>                | –     | –                                       | –                        | 720                      | –                             |
| DMC- P(OEt) <sub>3</sub>           | 30    | 2195                                    | –                        |                          | 465                           |
|                                    | 50    | 2195                                    | 1230                     |                          | 470                           |
|                                    | 70    | 2197                                    | 1231                     | 789                      | 474                           |
|                                    | 90    | 2196                                    | 1225                     |                          | 472                           |

**Table S5** Summary of the XPS results of DMC catalysts prepared by different CAs

| Catalyst<br>(prep. temp. in °C) <sup>a</sup> | Zn 2p3     |             | Co 2p3     |             | O 1s       |             | N 1s       |             | C 1s       |             | Cl 2p      |             | P 2p       |             |
|----------------------------------------------|------------|-------------|------------|-------------|------------|-------------|------------|-------------|------------|-------------|------------|-------------|------------|-------------|
|                                              | BE<br>(eV) | [AT]<br>(%) |
| ZnCl <sub>2</sub>                            | 1023.7     | —           | —          | —           | —          | —           | —          | —           | —          | —           | —          | —           | —          | —           |
| K <sub>3</sub> Co(CN) <sub>6</sub>           | —          | —           | 781        | —           | —          | —           | —          | —           | —          | —           | —          | —           | —          | —           |
| DMC-pure                                     | 1021.9     | —           | 781.7      | —           | 531.2      | —           | 398.2      | —           | 285        | —           | 198.5      | —           | —          | —           |
| DMC-DEP (30)                                 | 1023.2     | 4.8         | 783.1      | 2.7         | 533.4      | 15          | 399.4      | 12.3        | 286.6      | 61.9        | 199        | 2.2         | 134.4      | 1.1         |
| DMC-DEP (50)                                 | 1023.0     | 6.5         | 783.3      | 3.4         | 533.0      | 22.2        | 399.6      | 14.2        | 286.6      | 48.7        | 199        | 1           | 134.2      | 3.9         |
| DMC-DEP (70)                                 | 1022.6     | 5.9         | 782.8      | 3.5         | 532.8      | 20.5        | 399.1      | 15.7        | 286.3      | 50.8        | 198.4      | 0.8         | 133.9      | 2.9         |
| DMC-DEP (90)                                 | 1022.8     | 1.5         | 783.1      | 0.8         | 533.3      | 18          | 399.3      | 4.2         | 285.1      | 74.3        | 198.6      | 0.2         | 133.9      | 1           |
| DMC-P(OEt) <sub>3</sub> (30)                 | 1022.9     | 0.9         | 782.9      | 0.6         | 533.2      | 17.6        | 399.3      | 2.5         | 285.1      | 77.7        | 198.6      | 0.4         | 134.5      | 0.3         |
| DMC-P(OEt) <sub>3</sub> (50)                 | 1023.4     | 6.6         | 783.1      | 3.9         | 533.2      | 19.3        | 399.6      | 16          | 286.5      | 50.5        | 199.0      | 0.8         | 134.3      | 2.9         |
| DMC-P(OEt) <sub>3</sub> (70)                 | 1023.2     | 2.4         | 782.9      | 1.5         | 533.3      | 16.8        | 399.4      | 6.4         | 285        | 71.1        | 198.9      | 1.1         | 134.6      | 0.6         |
| DMC-P(OEt) <sub>3</sub> (90)                 | 1022.9     | 2.5         | 782.9      | 1.4         | 533.1      | 19.1        | 399.5      | 6.4         | 285.1      | 69          | 198.7      | 0.2         | 133.9      | 1.4         |
| DMC-TEP                                      | 1023.1     | 2.6         | 782.7      | 1.4         | 533.5      | 15.8        | 399.6      | 6.4         | 285        | 71.5        | 199.7      | 1.1         | 134.9      | 1.2         |
| DMC-DMMP                                     | 1022.6     | 2.7         | 782.6      | 1.9         | 532.9      | 17.6        | 399.1      | 9.6         | 286.4      | 66.4        | 198.4      | 0.5         | 133.9      | 1.4         |

<sup>a</sup> Catalysts and their optimized preparation temperature.

**Table S6** Results for the semi-batch ROP of PO using various DMC catalysts

| Entry | Catalyst                 | Preparation condition |                            |        | TOF<br>(min <sup>-1</sup> ) | Polyol properties                                           |                       |                                               |                       |
|-------|--------------------------|-----------------------|----------------------------|--------|-----------------------------|-------------------------------------------------------------|-----------------------|-----------------------------------------------|-----------------------|
|       |                          | CA                    | <i>V</i> (mL) <sup>a</sup> | T (°C) |                             | <i>M<sub>n</sub></i> <sup>b</sup><br>(g mol <sup>-1</sup> ) | <i>D</i> <sup>c</sup> | unsat.<br>(meq g <sup>-1</sup> ) <sup>d</sup> | <i>F</i> <sup>e</sup> |
| 1     | DMC-DMP                  | DMP                   | 0.1                        | 70     | 215                         | 5600                                                        | 1.15                  | 0.00765                                       | 1.89                  |
| 2     | DMC-DEP                  | DEP                   | 0.1                        | 30     | 726                         | 4300                                                        | 1.15                  | 0.00793                                       | 1.88                  |
| 3     | DMC-DEP                  | DEP                   | 0.1                        | 50     | 404                         | —                                                           | —                     | —                                             |                       |
| 4     | DMC-DEP                  | DEP                   | 0.5                        | 50     | 318                         | —                                                           | —                     | —                                             |                       |
| 5     | DMC-DEP                  | DEP                   | 1.0                        | 50     | 47                          | —                                                           | —                     | —                                             |                       |
| 6     | DMC-DEP                  | DEP                   | 0.1                        | 70     | 360                         | —                                                           | —                     | —                                             |                       |
| 7     | DMC-DEP                  | DEP                   | 0.1                        | 90     | 56                          | —                                                           | —                     | —                                             |                       |
| 8     | DMC-DtBuP                | DtBuP                 | 0.1                        | 70     | 302                         | 4700                                                        | 1.12                  | 0.00850                                       | 1.98                  |
| 9     | DMC-DMMP                 | DMMP                  | 0.1                        | 30     | —                           | —                                                           | —                     | —                                             |                       |
| 10    | DMC-DMMP                 | DMMP                  | 0.1                        | 50     | —                           | —                                                           | —                     | —                                             |                       |
| 11    | DMC-DMMP                 | DMMP                  | 0.1                        | 70     | —                           | —                                                           | —                     | —                                             |                       |
| 12    | DMC-P(OMe) <sub>3</sub>  | P(OMe) <sub>3</sub>   | 0.1                        | 70     | 274                         | 4600                                                        | 1.14                  | 0.00623                                       | 1.92                  |
| 13    | DMC- P(OEt) <sub>3</sub> | P(OEt) <sub>3</sub>   | 0.1                        | 30     | 334                         | —                                                           | —                     | —                                             |                       |
| 14    | DMC- P(OEt) <sub>3</sub> | P(OEt) <sub>3</sub>   | 0.1                        | 50     | 253                         | —                                                           | —                     | —                                             |                       |
| 15    | DMC- P(OEt) <sub>3</sub> | P(OEt) <sub>3</sub>   | 0.5                        | 50     | 131                         | —                                                           | —                     | —                                             |                       |
| 16    | DMC- P(OEt) <sub>3</sub> | P(OEt) <sub>3</sub>   | 1.0                        | 50     | 154                         | —                                                           | —                     | —                                             |                       |

|                 |                                    |                                |          |    |     |      |      |         |      |
|-----------------|------------------------------------|--------------------------------|----------|----|-----|------|------|---------|------|
| 17              | DMC- P(OEt) <sub>3</sub>           | P(OEt) <sub>3</sub>            | 0.1      | 70 | 405 | 4400 | 1.17 | 0.00850 | 2.00 |
| 18              | DMC- P(OEt) <sub>3</sub>           | P(OEt) <sub>3</sub>            | 0.1      | 90 | 57  | —    | —    | —       |      |
| 19              | DMC-TMP                            | TMP                            | 0.1      | 70 | 15  | —    | —    | —       |      |
| 20              | DMC-TEP                            | TEP                            | 1.0      | 30 | 557 | —    | —    | —       |      |
| 21              | DMC-TEP                            | TEP                            | 0.1      | 50 | 191 | —    | —    | —       |      |
| 22              | DMC-TEP                            | TEP                            | 0.5      | 50 | 486 | —    | —    | —       |      |
| 23              | DMC-TEP                            | TEP                            | 1.0      | 50 | 550 | —    | —    | —       |      |
| 24              | DMC-TEP                            | TEP                            | 1.0      | 70 | 574 | 4100 | 1.14 | 0.00595 | 1.95 |
| 25              | DMC-TEP                            | TEP                            | 1.0      | 90 | 560 | —    | —    | —       |      |
| 26              | DMC-TIP                            | TIP                            | 1.0      | 70 | 403 | 4300 | 1.16 | 0.00623 | 1.98 |
| 27              | DMC-H <sub>3</sub> PO <sub>3</sub> | H <sub>3</sub> PO <sub>3</sub> | 0.1      | 30 | 51  | —    | —    | —       |      |
| 28 <sup>f</sup> | DMC- <i>t</i> BuOH                 | <i>t</i> BuOH                  | 60 mmol  | 50 | 212 | 3200 | 1.12 | 0.0065  | 1.72 |
| 29 <sup>f</sup> | DMC- <i>t</i> BuOH                 | <i>t</i> BuOH                  | 120 mmol | 50 | 174 | —    | —    | —       |      |
| 30 <sup>f</sup> | DMC- <i>t</i> BuOH                 | <i>t</i> BuOH                  | 150 mmol | 50 | 154 | —    | —    | —       |      |

<sup>a</sup> Amount of OPCs. <sup>b</sup> Number average molecular weight measured by GPC (THF solvent). <sup>c</sup> Polydispersity index. <sup>d</sup> Unsaturation level. <sup>e</sup> Functionality determined by titration. <sup>f</sup> Obtained from ref [1]. Reaction condition: Catalyst loading ( $n_{Zn}$ ) = 0.3 mmol, PO = 3.5 mol, PPG-600 = 50 mmol,  $T_P$  = 115 °C.

### 3. References

- [1] C.H. Tran, S.J. Lee, B.-r. Moon, E.-g. Lee, H.-k. Choi, I. Kim, Organonitriles as complexing agents for the double metal cyanide-catalyzed synthesis of polyether, polyester, and polycarbonate polyols, *Catal. Today*, 418 (2023) 114125.
- [2] R.G. Pearson, Absolute electronegativity and hardness: application to inorganic chemistry, *Inorg. Chem.*, 27 (1988) 734–740.
